# Supplementary material for: Synthesis and Functionalization of Challenging meso-Substituted Aryl Bis-pocket Porphyrins Accessed via Suzuki–Miyaura Cross-Coupling
Source: PubMed Central journal article supplement (PMC9447288; doi:10.1021/acs.joc.2c01538), 2022-08-17
Supplement: jo2c01538_si_001.pdf [file jo2c01538_si_001.pdf]

# Supporting Information for

## Synthesis and Functionalization of Challenging *meso*-Substituted Aryl Bis-pocket Porphyrins Accessed via Suzuki-Miyaura Cross-Coupling

*Daniel G. Droege, A. Leila Parker, Griffin M. Milligan, Robert Jenkins, and Timothy C.*

*Johnstone\**

Department of Chemistry and Biochemistry, University of California, Santa Cruz, California  
95064, United States.

\* Correspondence to: [johnstone@ucsc.edu](mailto:johnstone@ucsc.edu)

## CONTENTS

|                                                                                    | <b>Page</b> |
|------------------------------------------------------------------------------------|-------------|
| Experimental methods                                                               | S3          |
| Tables S1–S7: Crystallographic details                                             | S5-S11      |
| Tables S8: POVME2 pocket volumes                                                   | S12         |
| NMR spectra                                                                        | S13-S36     |
| Figures S1-S4: HPLC chromatograms of <b>4b</b> , <b>4d</b> , <b>4e</b> , <b>4f</b> | S37-S38     |
| Figures S5–S24: Thermal ellipsoid plots                                            | S39-S58     |
| References                                                                         | S59         |

## Experimental Methods

**X-ray crystallography.** Crystals of **2b**, **2c**, **2d**, **2e**, **2f**, **2h**, **2i**, **2k**, **2l**, **2m**, **2o**, **2p**, **2q**, **3b**, **4a**, **4b**, **4c**, **4d**, **4e**, and **4f** were grown as described in the Experimental Section of the main text. Single crystals suitable for X-ray diffraction were selected under a microscope, loaded onto a nylon fiber loop using Paratone-N, and mounted onto a Rigaku XtaLAB Synergy-S single-crystal diffractometer. Each crystal was cooled to 100 K under a stream of nitrogen. Diffraction of Cu K $\alpha$  radiation from a PhotonJet-S microfocus source was detected using a HyPix-6000HE hybrid photon counting detector. Screening, indexing, data collection, and data processing were performed with CrysAlis<sup>Pro</sup>.<sup>3</sup> The structures were solved using SHELXT and refined using SHELXL as implemented in OLEX2 following established strategies.<sup>4-7</sup> Unless otherwise specified in the CIF, all non-H atoms were refined anisotropically and H atoms were placed at calculated positions and refined with a riding model and coupled isotropic displacement parameters. As noted in the appropriate CIFs, a number of the structures featured pockets of disordered solvent that could not be satisfactorily modeled. In these instances, the contribution of the electron density in those pockets to the observed structure factors was masked using Olex2. Refinement parameters are collected in Tables S1- S7.

**Pocket volume estimation.** Pocket volumes were calculated using POVME2.<sup>1</sup> PDB files of each porphyrin were generated from the corresponding X-ray diffraction coordinates. The grid spacing was set to 0.5 Å and a points-inclusion sphere of 10-Å radius was generated at the center of each porphyrin. A contiguous pocket-seed sphere of 4-Å radius was generated at the center of each porphyrin and a contiguous points criterion of 5 was employed (criteria of 3 and 7 were used for

**2b** and **2m**, respectively). Molecular graphics were generated with UCSF ChimeraX.<sup>2</sup> Pocket volumes are collected in Table S8.

**Table S1.** Crystallographic Refinement Details

| <b>Compound</b>                       | <b>2b·2MeCN</b>                                                                 | <b>2c·MeCN·1.5CHCl<sub>3</sub></b>                                                     | <b>2d·MeCN·3C<sub>6</sub>H<sub>3</sub>Cl<sub>3</sub></b>                         |
|---------------------------------------|---------------------------------------------------------------------------------|----------------------------------------------------------------------------------------|----------------------------------------------------------------------------------|
| Formula                               | C <sub>108</sub> H <sub>84</sub> F <sub>16</sub> N <sub>6</sub> Si <sub>4</sub> | C <sub>107.5</sub> H <sub>82.5</sub> C <sub>120.5</sub> N <sub>5</sub> Si <sub>4</sub> | C <sub>140</sub> H <sub>138</sub> Cl <sub>9</sub> N <sub>5</sub> Si <sub>4</sub> |
| FW                                    | 1882.17                                                                         | 2283.37                                                                                | 2321.96                                                                          |
| T (K)                                 | 100.0(11)                                                                       | 99.99(10)                                                                              | 100.01(10)                                                                       |
| λ (Å)                                 | 1.54184                                                                         | 1.54184                                                                                | 1.54184                                                                          |
| Crystal System                        | Triclinic                                                                       | Monoclinic                                                                             | Monoclinic                                                                       |
| Space group                           | <i>P</i> $\bar{1}$                                                              | <i>I</i> 2/ <i>a</i>                                                                   | <i>P</i> 2 <sub>1</sub> / <i>n</i>                                               |
| <i>a</i> (Å)                          | 12.5909(2)                                                                      | 23.2819(2)                                                                             | 16.53020(10)                                                                     |
| <i>b</i> (Å)                          | 13.6056(2)                                                                      | 19.67030(10)                                                                           | 40.0808(3)                                                                       |
| <i>c</i> (Å)                          | 17.3122(2)                                                                      | 47.5453(3)                                                                             | 19.68380(10)                                                                     |
| α (°)                                 | 103.7060(10)                                                                    | 90                                                                                     | 90                                                                               |
| β (°)                                 | 106.6640(10)                                                                    | 92.3390(10)                                                                            | 97.4540(10)                                                                      |
| γ (°)                                 | 106.8540(2)                                                                     | 90                                                                                     | 90                                                                               |
| Volume (Å <sup>3</sup> )              | 2548.03(7)                                                                      | 21755.8(3)                                                                             | 12931.17(14)                                                                     |
| <i>Z</i>                              | 1                                                                               | 8                                                                                      | 4                                                                                |
| Size (mm <sup>3</sup> )               | 0.16×0.07×0.04                                                                  | 0.41×0.31×0.03                                                                         | 0.16×0.11×0.06                                                                   |
| θ range (°)                           | 2.843-67.078                                                                    | 2.942-67.077                                                                           | 2.518-67.079                                                                     |
| Total data                            | 34597                                                                           | 138551                                                                                 | 175824                                                                           |
| Unique data                           | 9086                                                                            | 19392                                                                                  | 23102                                                                            |
| Parameters                            | 610                                                                             | 1307                                                                                   | 1599                                                                             |
| Completeness (%)                      | 99.9                                                                            | 99.9                                                                                   | 100.0                                                                            |
| <i>R</i> <sub>int</sub> (%)           | 2.90                                                                            | 4.61                                                                                   | 4.19                                                                             |
| <i>R</i> <sub>1</sub> (% , I > 2σ)    | 3.69                                                                            | 6.39                                                                                   | 7.74                                                                             |
| <i>R</i> <sub>1</sub> (% , all data)  | 4.14                                                                            | 6.90                                                                                   | 8.05                                                                             |
| <i>wR</i> <sub>2</sub> (% , I > 2σ)   | 9.60                                                                            | 18.20                                                                                  | 20.51                                                                            |
| <i>wR</i> <sub>2</sub> (% , all data) | 9.87                                                                            | 18.72                                                                                  | 20.70                                                                            |
| <i>S</i>                              | 1.028                                                                           | 1.033                                                                                  | 1.158                                                                            |

**Table S2.** Crystallographic Refinement Details

| <b>Compound</b>                                     | <b>2e·MeCN·C<sub>7</sub>H<sub>8</sub></b>                        | <b>2f·2MeCN</b>                                                  | <b>2h·2MeCN·C<sub>7</sub>H<sub>5</sub>N</b>                                    |
|-----------------------------------------------------|------------------------------------------------------------------|------------------------------------------------------------------|--------------------------------------------------------------------------------|
| Formula                                             | C <sub>123</sub> H <sub>124</sub> N <sub>6</sub> Si <sub>4</sub> | C <sub>132</sub> H <sub>148</sub> N <sub>6</sub> Si <sub>4</sub> | C <sub>115</sub> H <sub>97</sub> F <sub>8</sub> N <sub>7</sub> Si <sub>4</sub> |
| FW                                                  | 1798.63                                                          | 1930.92                                                          | 1841.35                                                                        |
| T (K)                                               | 100.6(10)                                                        | 100.00(11)                                                       | 101(1)                                                                         |
| $\lambda$ (Å)                                       | 1.54184                                                          | 1.54184                                                          | 1.54184                                                                        |
| Crystal System                                      | Monoclinic                                                       | Triclinic                                                        | Monoclinic                                                                     |
| Space group                                         | <i>P2<sub>1</sub>/c</i>                                          | <i>P</i> $\bar{1}$                                               | <i>P2<sub>1</sub>/c</i>                                                        |
| <i>a</i> (Å)                                        | 16.34530(10)                                                     | 13.3916(5)                                                       | 17.9444(2)                                                                     |
| <i>b</i> (Å)                                        | 29.9212(2)                                                       | 15.4829(7)                                                       | 14.42580(10)                                                                   |
| <i>c</i> (Å)                                        | 23.1963(2)                                                       | 16.1203(6)                                                       | 23.4254(2)                                                                     |
| $\alpha$ (°)                                        | 90                                                               | 67.333(4)                                                        | 90                                                                             |
| $\beta$ (°)                                         | 107.5830(10)                                                     | 72.696(3)                                                        | 110.6190(10)                                                                   |
| $\gamma$ (°)                                        | 90                                                               | 87.191(3)                                                        | 90                                                                             |
| Volume (Å <sup>3</sup> )                            | 10814.62(15)                                                     | 2936.5(2)                                                        | 5675.51(10)                                                                    |
| <i>Z</i>                                            | 4                                                                | 1                                                                | 2                                                                              |
| Size (mm <sup>3</sup> )                             | 0.13×0.08×0.07                                                   | 0.88×0.18×0.05                                                   | 0.29×0.17×0.05                                                                 |
| $\theta$ range (°)                                  | 2.485-67.079                                                     | 3.117-67.067                                                     | 2.631-67.078                                                                   |
| Total data                                          | 171800                                                           | 38820                                                            | 106189                                                                         |
| Unique data                                         | 19313                                                            | 10456                                                            | 10128                                                                          |
| Parameters                                          | 1281                                                             | 732                                                              | 646                                                                            |
| Completeness (%)                                    | 100                                                              | 99.9                                                             | 99.9                                                                           |
| <i>R</i> <sub>int</sub> (%)                         | 3.28                                                             | 5.87                                                             | 3.90                                                                           |
| <i>R</i> <sub>1</sub> (% , <i>I</i> > 2 $\sigma$ )  | 4.51                                                             | 5.63                                                             | 5.65                                                                           |
| <i>R</i> <sub>1</sub> (% , all data)                | 4.79                                                             | 6.59                                                             | 5.86                                                                           |
| <i>wR</i> <sub>2</sub> (% , <i>I</i> > 2 $\sigma$ ) | 11.01                                                            | 15.16                                                            | 15.41                                                                          |
| <i>wR</i> <sub>2</sub> (% , all data)               | 11.16                                                            | 15.97                                                            | 15.57                                                                          |
| <i>S</i>                                            | 1.114                                                            | 1.033                                                            | 1.047                                                                          |

**Table S3.** Crystallographic Refinement Details

| <b>Compound</b>                            | <b>2i·CHCl<sub>3</sub></b>                                                                      | <b>2k·2MeCN·CHCl<sub>3</sub></b>                                                                | <b>2l·2MeCN</b>                                                  |
|--------------------------------------------|-------------------------------------------------------------------------------------------------|-------------------------------------------------------------------------------------------------|------------------------------------------------------------------|
| Formula                                    | C <sub>113</sub> H <sub>87</sub> Cl <sub>3</sub> F <sub>24</sub> N <sub>4</sub> Si <sub>4</sub> | C <sub>117</sub> H <sub>117</sub> Cl <sub>3</sub> N <sub>6</sub> O <sub>8</sub> Si <sub>4</sub> | C <sub>140</sub> H <sub>116</sub> N <sub>6</sub> Si <sub>4</sub> |
| FW                                         | 2175.57                                                                                         | 1953.87                                                                                         | 1994.74                                                          |
| T (K)                                      | 99.99(10)                                                                                       | 100.0(13)                                                                                       | 99.98(15)                                                        |
| λ (Å)                                      | 1.54184                                                                                         | 1.54184                                                                                         | 1.54184                                                          |
| Crystal System                             | Monoclinic                                                                                      | Triclinic                                                                                       | Monoclinic                                                       |
| Space group                                | <i>P</i> 2 <sub>1</sub> / <i>n</i>                                                              | <i>P</i> $\bar{1}$                                                                              | <i>P</i> 2 <sub>1</sub> / <i>c</i>                               |
| <i>a</i> (Å)                               | 18.7167(2)                                                                                      | 11.9189(2)                                                                                      | 16.6762(3)                                                       |
| <i>b</i> (Å)                               | 23.8213(2)                                                                                      | 15.7967(3)                                                                                      | 23.8081(4)                                                       |
| <i>c</i> (Å)                               | 26.6679(3)                                                                                      | 16.5347(3)                                                                                      | 30.0004(3)                                                       |
| α (°)                                      | 90                                                                                              | 101.9810(10)                                                                                    | 90                                                               |
| β (°)                                      | 93.2670(10)                                                                                     | 108.897(2)                                                                                      | 91.4430(10)                                                      |
| γ (°)                                      | 90                                                                                              | 107.1330(10)                                                                                    | 90                                                               |
| Volume (Å <sup>3</sup> )                   | 11870.7(2)                                                                                      | 2651.88(9)                                                                                      | 11907.2(3)                                                       |
| <i>Z</i>                                   | 4                                                                                               | 1                                                                                               | 4                                                                |
| Size (mm <sup>3</sup> )                    | 0.22×0.1×0.06                                                                                   | 0.23×0.09×0.06                                                                                  | 0.23×0.15×0.03                                                   |
| θ range (°)                                | 2.489-67.077                                                                                    | 2.998-67.078                                                                                    | 2.369-67.078                                                     |
| Total data                                 | 167793                                                                                          | 35890                                                                                           | 95662                                                            |
| Unique data                                | 21182                                                                                           | 9457                                                                                            | 21185                                                            |
| Parameters                                 | 1510                                                                                            | 651                                                                                             | 1598                                                             |
| Completeness (%)                           | 100.0                                                                                           | 99.9                                                                                            | 99.6                                                             |
| <i>R</i> <sub>int</sub> (%)                | 4.76                                                                                            | 3.42                                                                                            | 3.62                                                             |
| <i>R</i> <sub>1</sub> (% , <i>I</i> > 2σ)  | 6.51                                                                                            | 6.01                                                                                            | 6.76                                                             |
| <i>R</i> <sub>1</sub> (% , all data)       | 7.53                                                                                            | 6.66                                                                                            | 8.32                                                             |
| <i>wR</i> <sub>2</sub> (% , <i>I</i> > 2σ) | 16.97                                                                                           | 16.44                                                                                           | 18.24                                                            |
| <i>wR</i> <sub>2</sub> (% , all data)      | 17.69                                                                                           | 16.97                                                                                           | 19.37                                                            |
| <i>S</i>                                   | 1.029                                                                                           | 1.042                                                                                           | 1.022                                                            |

**Table S4.** Crystallographic Refinement Details

| <b>Compound</b>                                     | <b>2m</b>                                                      | <b>2o·5MeCN</b>                                                   | <b>2p</b>                                                                        |
|-----------------------------------------------------|----------------------------------------------------------------|-------------------------------------------------------------------|----------------------------------------------------------------------------------|
| Formula                                             | C <sub>80</sub> H <sub>94</sub> N <sub>4</sub> Si <sub>4</sub> | C <sub>138</sub> H <sub>173</sub> N <sub>9</sub> Si <sub>12</sub> | C <sub>128</sub> H <sub>126</sub> N <sub>4</sub> O <sub>16</sub> Si <sub>4</sub> |
| FW                                                  | 1223.95                                                        | 2294.92                                                           | 2088.68                                                                          |
| T (K)                                               | 99.99(14)                                                      | 100.01(10)                                                        | 100.01(10)                                                                       |
| $\lambda$ (Å)                                       | 1.54184                                                        | 1.54184                                                           | 1.54184                                                                          |
| Crystal System                                      | Triclinic                                                      | Monoclinic                                                        | Monoclinic                                                                       |
| Space group                                         | <i>P</i> $\bar{1}$                                             | <i>P</i> 2 <sub>1</sub> / <i>n</i>                                | <i>I</i> 2/ <i>a</i>                                                             |
| <i>a</i> (Å)                                        | 14.3294(2)                                                     | 23.9843(2)                                                        | 22.8311(2)                                                                       |
| <i>b</i> (Å)                                        | 16.7136(3)                                                     | 24.2555(2)                                                        | 24.7546(3)                                                                       |
| <i>c</i> (Å)                                        | 18.2148(2)                                                     | 27.5665(2)                                                        | 23.6019(4)                                                                       |
| $\alpha$ (°)                                        | 103.3400(10)                                                   | 90                                                                | 90                                                                               |
| $\beta$ (°)                                         | 90.2160(10)                                                    | 90.8630(10)                                                       | 98.1630(10)                                                                      |
| $\gamma$ (°)                                        | 100.0870(10)                                                   | 90                                                                | 90                                                                               |
| Volume (Å <sup>3</sup> )                            | 4174.61(11)                                                    | 16035.0(2)                                                        | 13204.0(3)                                                                       |
| <i>Z</i>                                            | 2                                                              | 4                                                                 | 4                                                                                |
| Size (mm <sup>3</sup> )                             | 0.29×0.08×0.03                                                 | 0.81×0.6×0.27                                                     | 0.29×0.25×0.18                                                                   |
| $\theta$ range (°)                                  | 2.496-67.075                                                   | 2.424-67.080                                                      | 2.601-67.073                                                                     |
| Total data                                          | 56459                                                          | 218940                                                            | 11799                                                                            |
| Unique data                                         | 14868                                                          | 28618                                                             | 11799                                                                            |
| Parameters                                          | 897                                                            | 1681                                                              | 878                                                                              |
| Completeness (%)                                    | 99.8                                                           | 99.9                                                              | 100.0                                                                            |
| <i>R</i> <sub>int</sub> (%)                         | 4.38                                                           | 5.03                                                              | N/A <sup>a</sup>                                                                 |
| <i>R</i> <sub>1</sub> (% , <i>I</i> > 2 $\sigma$ )  | 8.19                                                           | 6.82                                                              | 10.13                                                                            |
| <i>R</i> <sub>1</sub> (% , all data)                | 8.84                                                           | 7.44                                                              | 10.63                                                                            |
| <i>wR</i> <sub>2</sub> (% , <i>I</i> > 2 $\sigma$ ) | 20.86                                                          | 18.58                                                             | 30.79                                                                            |
| <i>wR</i> <sub>2</sub> (% , all data)               | 21.25                                                          | 19.11                                                             | 31.29                                                                            |
| <i>S</i>                                            | 1.091                                                          | 1.024                                                             | 1.049                                                                            |

<sup>a</sup> Non-merohedral twin



**Table S5.** Crystallographic Refinement Details

| <b>Compound</b>                           | <b>2q·½Et<sub>2</sub>O</b>                                                        | <b>3b·5C<sub>6</sub>H<sub>14</sub>O<sub>3</sub></b>                                                             | <b>4a·MeCN·H<sub>2</sub>O</b>                                       |
|-------------------------------------------|-----------------------------------------------------------------------------------|-----------------------------------------------------------------------------------------------------------------|---------------------------------------------------------------------|
| Formula                                   | C <sub>90</sub> H <sub>99</sub> N <sub>20</sub> O <sub>0.50</sub> Si <sub>4</sub> | C <sub>122</sub> H <sub>112</sub> F <sub>16</sub> N <sub>4</sub> Na <sub>4</sub> O <sub>27</sub> S <sub>4</sub> | C <sub>106</sub> H <sub>97</sub> N <sub>5</sub> OSi <sub>4</sub> Zn |
| FW                                        | 1581.25                                                                           | 2590.35                                                                                                         | 1634.61                                                             |
| T (K)                                     | 100.0(3)                                                                          | 100.01(11)                                                                                                      | 100.0(10)                                                           |
| λ (Å)                                     | 1.54184                                                                           | 1.54184                                                                                                         | 1.54184                                                             |
| Crystal System                            | Triclinic                                                                         | Monoclinic                                                                                                      | Triclinic                                                           |
| Space group                               | <i>P</i> $\bar{1}$                                                                | <i>C</i> 2/ <i>m</i>                                                                                            | <i>P</i> $\bar{1}$                                                  |
| <i>a</i> (Å)                              | 15.5214(3)                                                                        | 13.5375(2)                                                                                                      | 13.1539(2)                                                          |
| <i>b</i> (Å)                              | 16.8377(3)                                                                        | 32.1685(4)                                                                                                      | 13.6553(2)                                                          |
| <i>c</i> (Å)                              | 19.6805(3)                                                                        | 14.4984(2)                                                                                                      | 16.1176(3)                                                          |
| α (°)                                     | 104.498(2)                                                                        | 90                                                                                                              | 73.1390(10)                                                         |
| β (°)                                     | 91.652(2)                                                                         | 90.9620(10)                                                                                                     | 70.611(2)                                                           |
| γ (°)                                     | 92.538(2)                                                                         | 90                                                                                                              | 61.251(2)                                                           |
| Volume (Å <sup>3</sup> )                  | 4970.49                                                                           | 6312.89(15)                                                                                                     | 2364.30(8)                                                          |
| <i>Z</i>                                  | 2                                                                                 | 2                                                                                                               | 1                                                                   |
| Size (mm <sup>3</sup> )                   | 0.27×0.05×0.04                                                                    | 0.15×0.08×0.07                                                                                                  | 0.1×0.06×0.03                                                       |
| θ range (°)                               | 2.321-67.077                                                                      | 2.747-67.067                                                                                                    | 2.943-67.078                                                        |
| Total data                                | 64662                                                                             | 39300                                                                                                           | 69421                                                               |
| Unique data                               | 17671                                                                             | 5750                                                                                                            | 8457                                                                |
| Parameters                                | 1121                                                                              | 537                                                                                                             | 552                                                                 |
| Completeness (%)                          | 99.5                                                                              | 100.0                                                                                                           | 100                                                                 |
| <i>R</i> <sub>int</sub> (%)               | 6.26                                                                              | 4.87                                                                                                            | 3.58                                                                |
| <i>R</i> <sub>1</sub> (%), <i>I</i> > 2σ  | 6.63                                                                              | 4.88                                                                                                            | 5.65                                                                |
| <i>R</i> <sub>1</sub> (%), all data       | 7.46                                                                              | 5.22                                                                                                            | 5.95                                                                |
| <i>wR</i> <sub>2</sub> (%), <i>I</i> > 2σ | 18.38                                                                             | 13.17                                                                                                           | 14.83                                                               |
| <i>wR</i> <sub>2</sub> (%), all data      | 19.22                                                                             | 13.43                                                                                                           | 15.04                                                               |
| <i>S</i>                                  | 1.041                                                                             | 1.050                                                                                                           | 1.115                                                               |

**Table S6.** Crystallographic Refinement Details

| <b>Compound</b>                                     | <b>4b·2MeCN</b>                                                   | <b>4c·2MeCN</b>                                                   | <b>4d·2MeCN</b>                                                   |
|-----------------------------------------------------|-------------------------------------------------------------------|-------------------------------------------------------------------|-------------------------------------------------------------------|
| Formula                                             | C <sub>108</sub> H <sub>98</sub> CuN <sub>6</sub> Si <sub>4</sub> | C <sub>108</sub> H <sub>98</sub> N <sub>6</sub> PdSi <sub>4</sub> | C <sub>108</sub> H <sub>98</sub> CoN <sub>6</sub> Si <sub>4</sub> |
| FW                                                  | 1655.82                                                           | 1698.68                                                           | 1651.21                                                           |
| T (K)                                               | 100.0(10)                                                         | 99.9(2)                                                           | 101(2)                                                            |
| $\lambda$ (Å)                                       | 1.54184                                                           | 1.54184                                                           | 1.54184                                                           |
| Crystal System                                      | Triclinic                                                         | Triclinic                                                         | Triclinic                                                         |
| Space group                                         | <i>P</i> $\bar{1}$                                                | <i>P</i> $\bar{1}$                                                | <i>P</i> $\bar{1}$                                                |
| <i>a</i> (Å)                                        | 13.1905(2)                                                        | 13.2012(3)                                                        | 13.1816(2)                                                        |
| <i>b</i> (Å)                                        | 13.6409(3)                                                        | 13.6615(3)                                                        | 13.6278(2)                                                        |
| <i>c</i> (Å)                                        | 16.0599(2)                                                        | 16.0477(3)                                                        | 16.0608(2)                                                        |
| $\alpha$ (°)                                        | 72.320(2)                                                         | 72.357(2)                                                         | 72.3800(10)                                                       |
| $\beta$ (°)                                         | 71.031(2)                                                         | 70.882(2)                                                         | 70.9320(10)                                                       |
| $\gamma$ (°)                                        | 61.419(2)                                                         | 61.519(2)                                                         | 61.282(2)                                                         |
| Volume (Å <sup>3</sup> )                            | 2361.21(9)                                                        | 2365.70(10)                                                       | 2354.14(7)                                                        |
| <i>Z</i>                                            | 1                                                                 | 1                                                                 | 1                                                                 |
| Size (mm <sup>3</sup> )                             | 0.15×0.07×0.02                                                    | 0.42×0.16×0.04                                                    | 0.1×0.08×0.03                                                     |
| $\theta$ range (°)                                  | 2.957-67.073                                                      | 2.961-67.080                                                      | 2.957-67.076                                                      |
| Total data                                          | 66105                                                             | 63611                                                             | 31966                                                             |
| Unique data                                         | 8428                                                              | 8428                                                              | 8410                                                              |
| Parameters                                          | 545                                                               | 545                                                               | 545                                                               |
| Completeness (%)                                    | 99.9                                                              | 99.6                                                              | 99.9                                                              |
| <i>R</i> <sub>int</sub> (%)                         | 4.61                                                              | 5.48                                                              | 3.01                                                              |
| <i>R</i> <sub>1</sub> (% , <i>I</i> > 2 $\sigma$ )  | 3.60                                                              | 3.87                                                              | 3.30                                                              |
| <i>R</i> <sub>1</sub> (% , all data)                | 4.14                                                              | 4.05                                                              | 3.42                                                              |
| <i>wR</i> <sub>2</sub> (% , <i>I</i> > 2 $\sigma$ ) | 9.38                                                              | 10.30                                                             | 7.76                                                              |
| <i>wR</i> <sub>2</sub> (% , all data)               | 9.70                                                              | 10.45                                                             | 7.82                                                              |
| <i>S</i>                                            | 1.035                                                             | 1.047                                                             | 1.023                                                             |

**Table S7.** Crystallographic Refinement Details

| <b>Compound</b>                       | <b>4e·MeCN·CHCl<sub>3</sub></b>                                                   | <b>4f·½C<sub>7</sub>H<sub>8</sub></b>                                  |
|---------------------------------------|-----------------------------------------------------------------------------------|------------------------------------------------------------------------|
| Formula                               | C <sub>107</sub> H <sub>96</sub> Cl <sub>4</sub> FeN <sub>5</sub> Si <sub>4</sub> | C <sub>123.5</sub> H <sub>128</sub> ClFeN <sub>4</sub> Si <sub>4</sub> |
| FW                                    | 1761.89                                                                           | 1871.95                                                                |
| T (K)                                 | 100.0(10)                                                                         | 100.0(12)                                                              |
| λ (Å)                                 | 1.54184                                                                           | 1.54184                                                                |
| Crystal System                        | Triclinic                                                                         | Monoclinic                                                             |
| Space group                           | <i>P</i> $\bar{1}$                                                                | <i>P</i> 2 <sub>1</sub> / <i>n</i>                                     |
| <i>a</i> (Å)                          | 12.8777(3)                                                                        | 13.85030(10)                                                           |
| <i>b</i> (Å)                          | 16.3497(4)                                                                        | 31.0859(3)                                                             |
| <i>c</i> (Å)                          | 23.5222(4)                                                                        | 26.2645(3)                                                             |
| α (°)                                 | 106.739(2)                                                                        | 90                                                                     |
| β (°)                                 | 90.100(2)                                                                         | 90.4670(10)                                                            |
| γ (°)                                 | 90.228(2)                                                                         | 90                                                                     |
| Volume (Å <sup>3</sup> )              | 4742.60(19)                                                                       | 11307.78(19)                                                           |
| <i>Z</i>                              | 2                                                                                 | 4                                                                      |
| Size (mm <sup>3</sup> )               | 0.21×0.09×0.05                                                                    | 0.07×0.05×0.03                                                         |
| θ range (°)                           | 2.822-67.081                                                                      | 2.843-67.071                                                           |
| Total data                            | 61182                                                                             | 143167                                                                 |
| Unique data                           | 16845                                                                             | 20048                                                                  |
| Parameters                            | 1158                                                                              | 1520                                                                   |
| Completeness (%)                      | 99.4                                                                              | 99.2                                                                   |
| <i>R</i> <sub>int</sub> (%)           | 4.20                                                                              | 5.84                                                                   |
| <i>R</i> <sub>1</sub> (% , I > 2σ)    | 11.82                                                                             | 7.60                                                                   |
| <i>R</i> <sub>1</sub> (% , all data)  | 12.45                                                                             | 9.08                                                                   |
| <i>wR</i> <sub>2</sub> (% , I > 2σ)   | 26.22                                                                             | 18.59                                                                  |
| <i>wR</i> <sub>2</sub> (% , all data) | 26.51                                                                             | 19.27                                                                  |
| <i>S</i>                              | 1.222                                                                             | 1.126                                                                  |

**Table S8.** Pocket Volumes

| Compound | Pocket Volume A <sup>3</sup> (a) | Pocket Volume (top, bottom) A <sup>3</sup> |
|----------|----------------------------------|--------------------------------------------|
| 2a       | 22 (11)                          |                                            |
| 2b       | 23.25(12)                        |                                            |
| 2c       | 34.75                            | (28.5, 6.25)                               |
| 2d       | 12.5                             | (9, 3.5)                                   |
| 2e       | 19.25(10)                        |                                            |
| 2f       | 34.75(17.3)                      |                                            |
| 2h       | 25.0(12.5)                       |                                            |
| 2i       | 13.0                             | (7.625,5.375)                              |
| 2k       | 31.75(16)                        |                                            |
| 2l       | 20.875(11)                       |                                            |
| 2m       | 44.5(22)                         |                                            |
| 2o       | 23.875(12.1)                     |                                            |
| 2p       | 16.25                            | (10.75,5.5)                                |
| 2q       | 10.25                            | Only top pocket                            |
| 3b       | 7.75 (3.875)                     |                                            |

<sup>a</sup> average volume across both pockets.

## NMR Spectra: Scope

### 2b $^1\text{H}$ NMR (500 MHz, $\text{CDCl}_3$ )

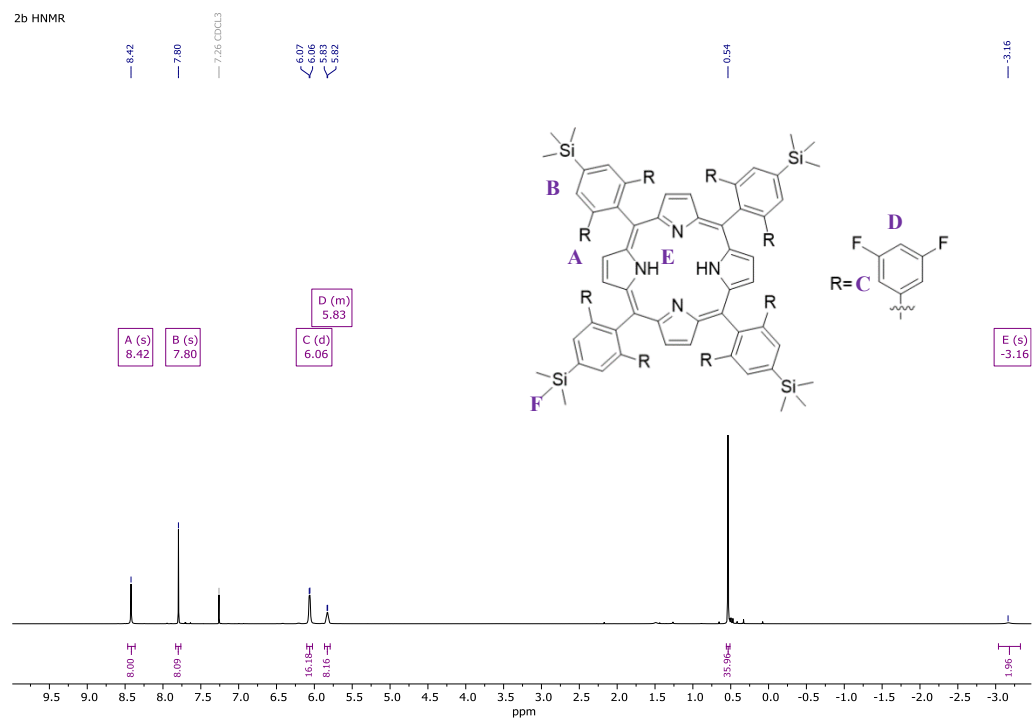

### 2b $^{19}\text{F}\{^1\text{H}\}$ NMR (470 MHz, $\text{CDCl}_3$ )

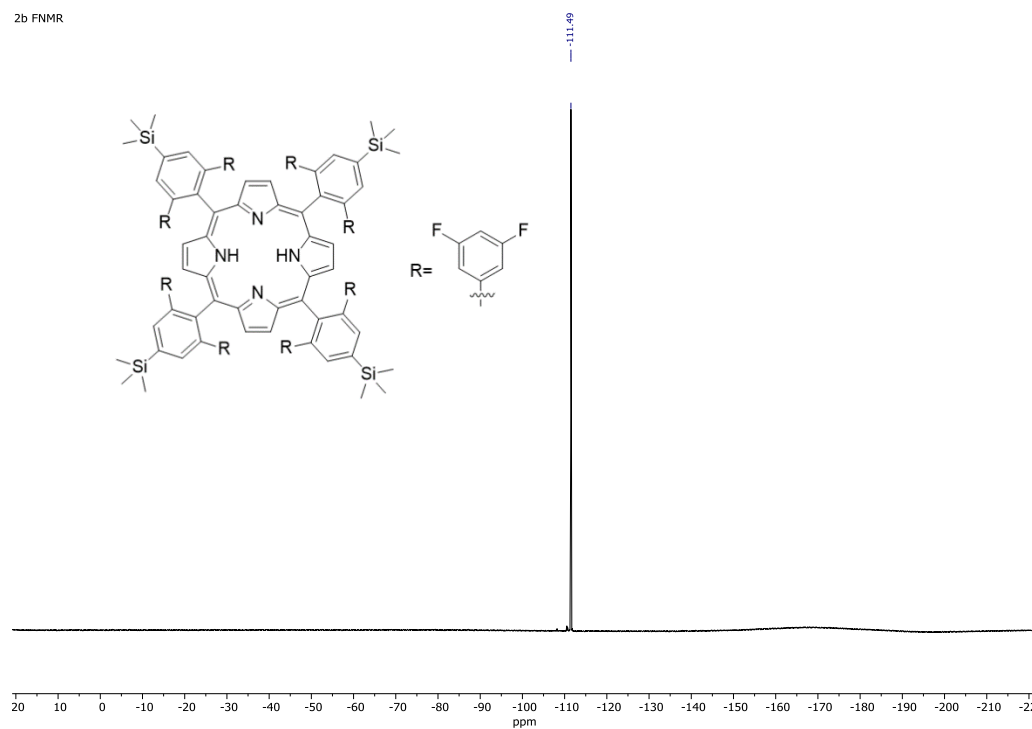

## 2b $^{13}\text{C}\{^1\text{H}\}$ NMR (126 MHz, $\text{CDCl}_3$ )

2b CNMR

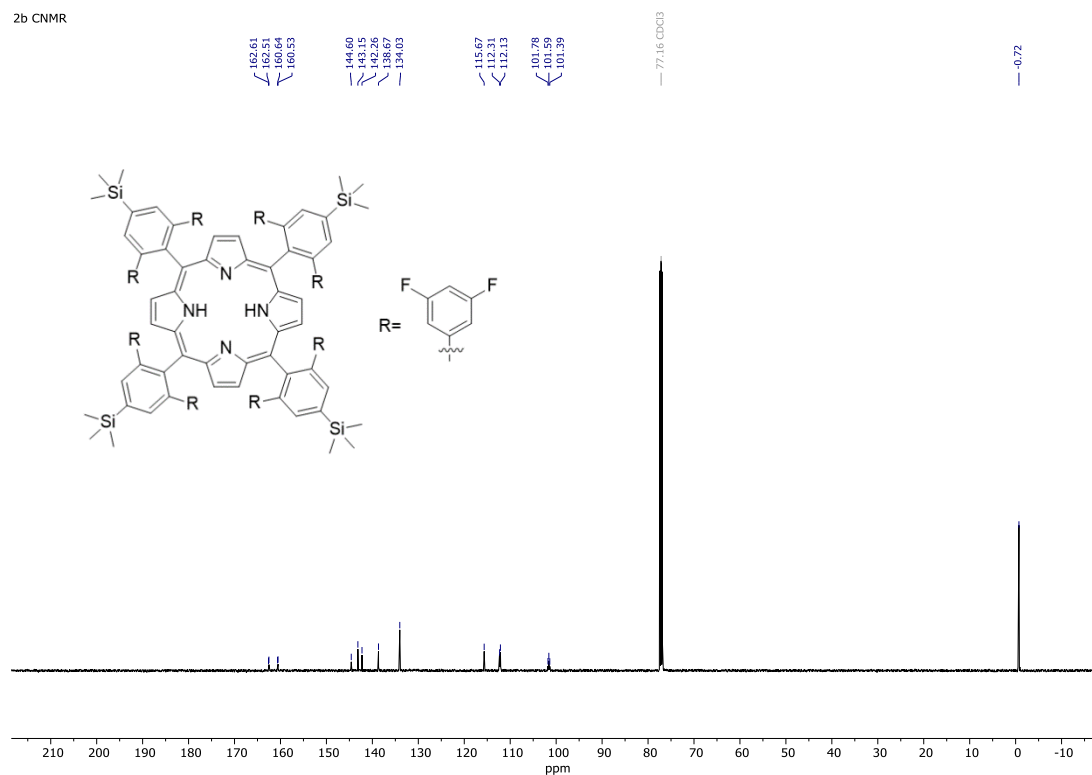

## 2c $^1\text{H}$ NMR (500 MHz, $\text{CDCl}_3$ )

2c HNMR

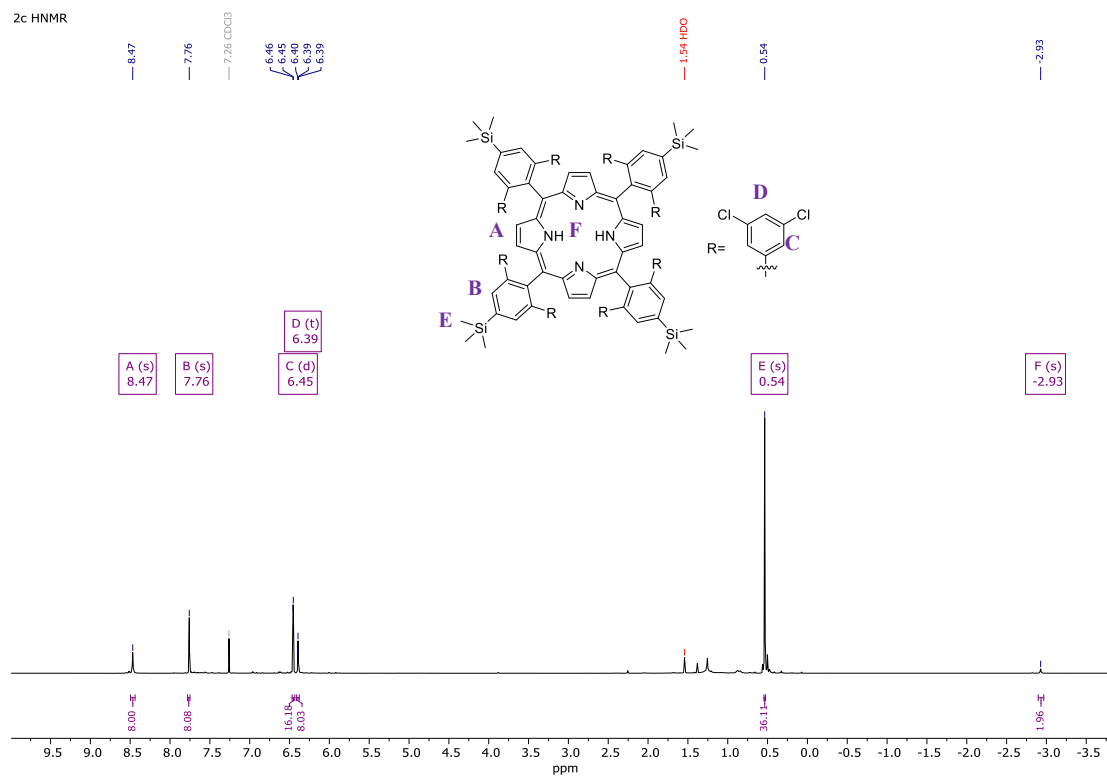

## 2c $^{13}\text{C}\{^1\text{H}\}$ NMR (126 MHz, $\text{CDCl}_3$ )

2c CNMR

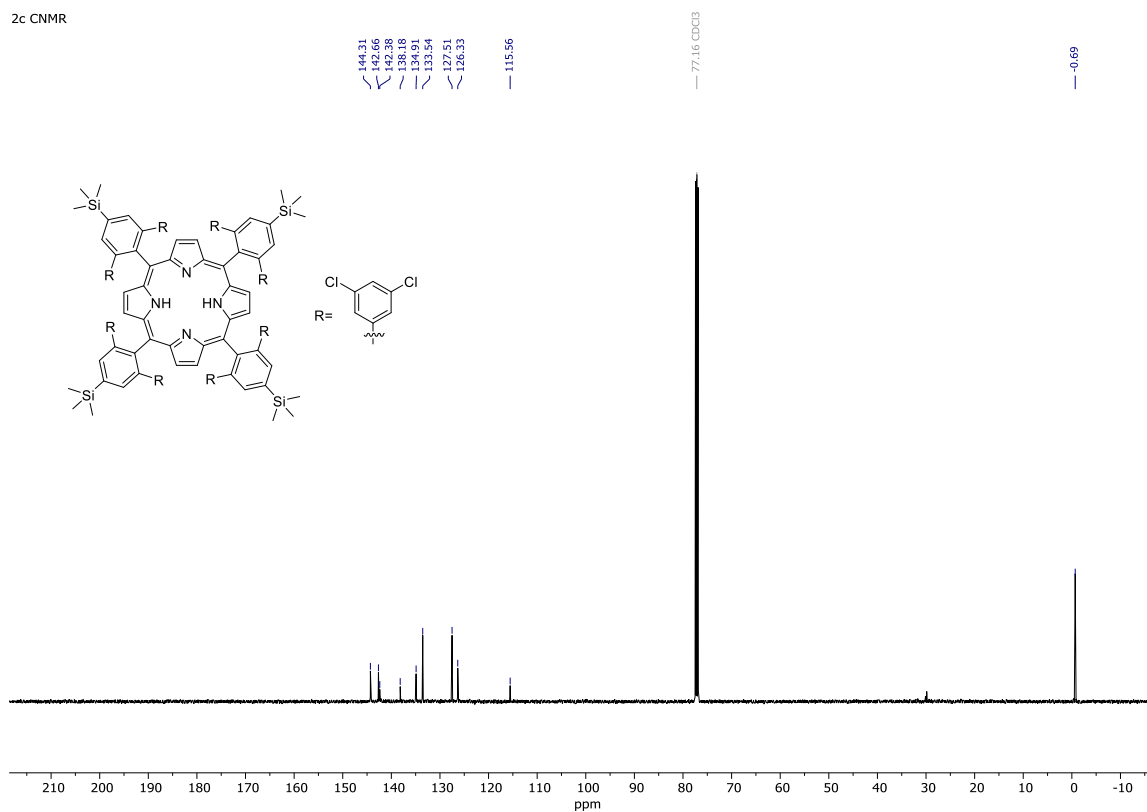

## 2d $^1\text{H}$ NMR (500 MHz, $\text{CDCl}_3$ )

2d HNMR

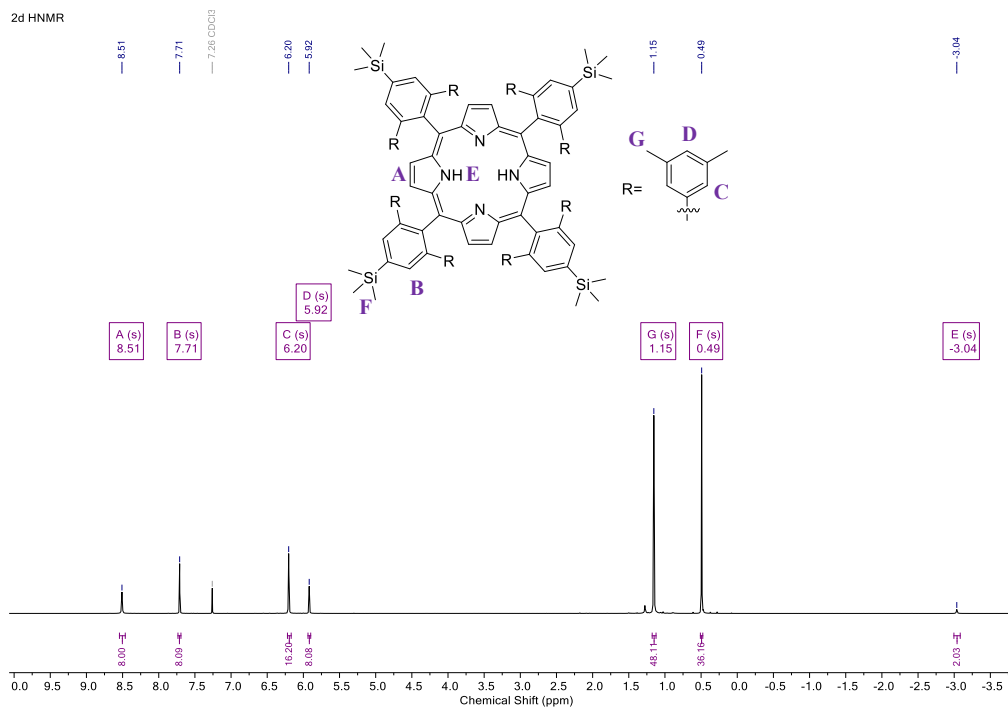

## 2d $^{13}\text{C}\{^1\text{H}\}$ NMR (126 MHz, $\text{CDCl}_3$ )

2d CNMR

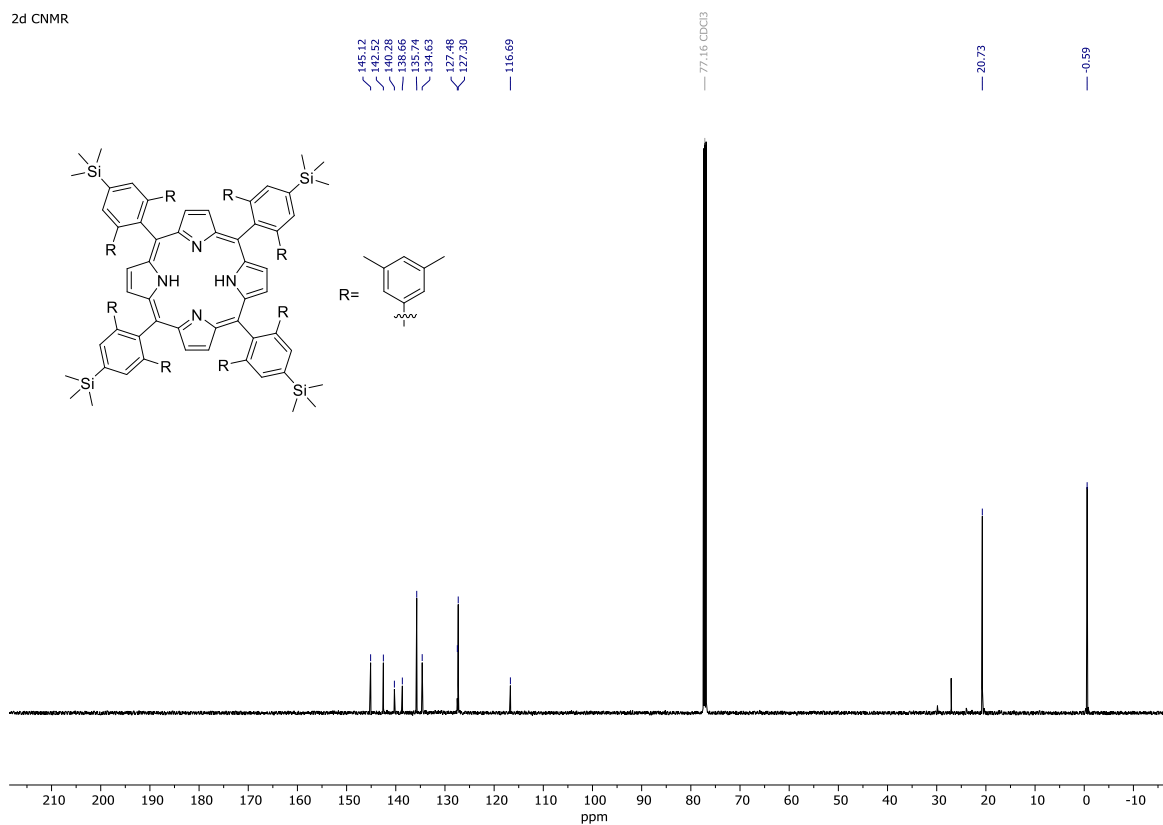

## 2e $^1\text{H}$ NMR (500 MHz, $\text{CDCl}_3$ )

2e HNMR

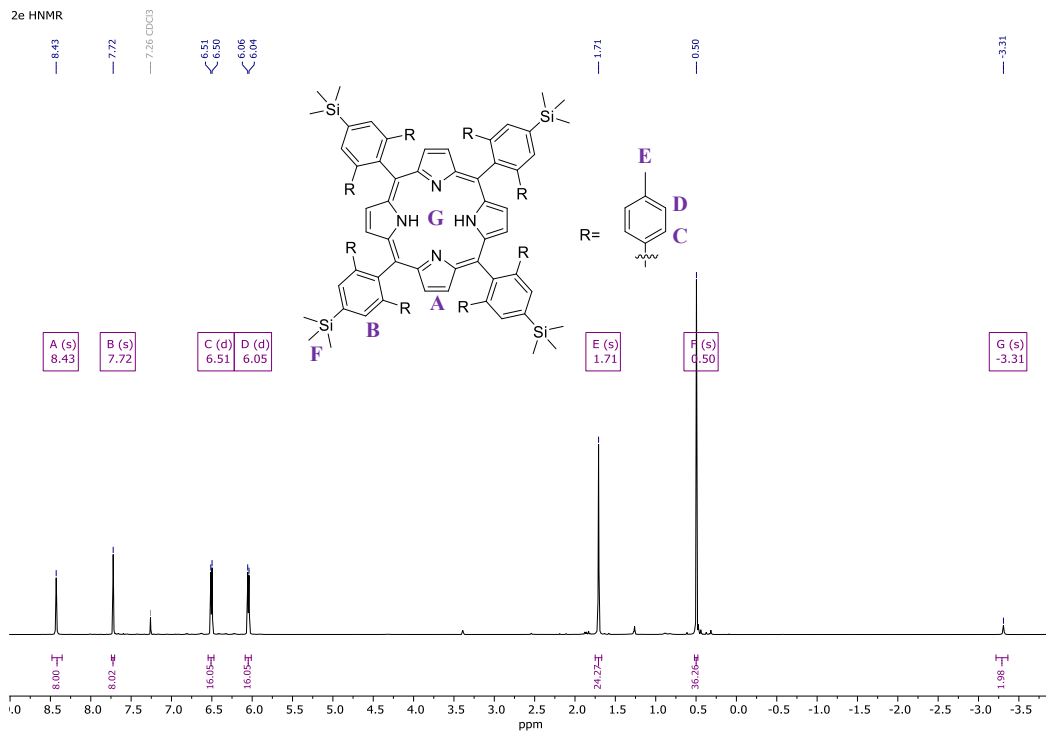



## 2e $^{13}\text{C}\{^1\text{H}\}$ NMR (126 MHz, $\text{CDCl}_3$ )

2e CNMR

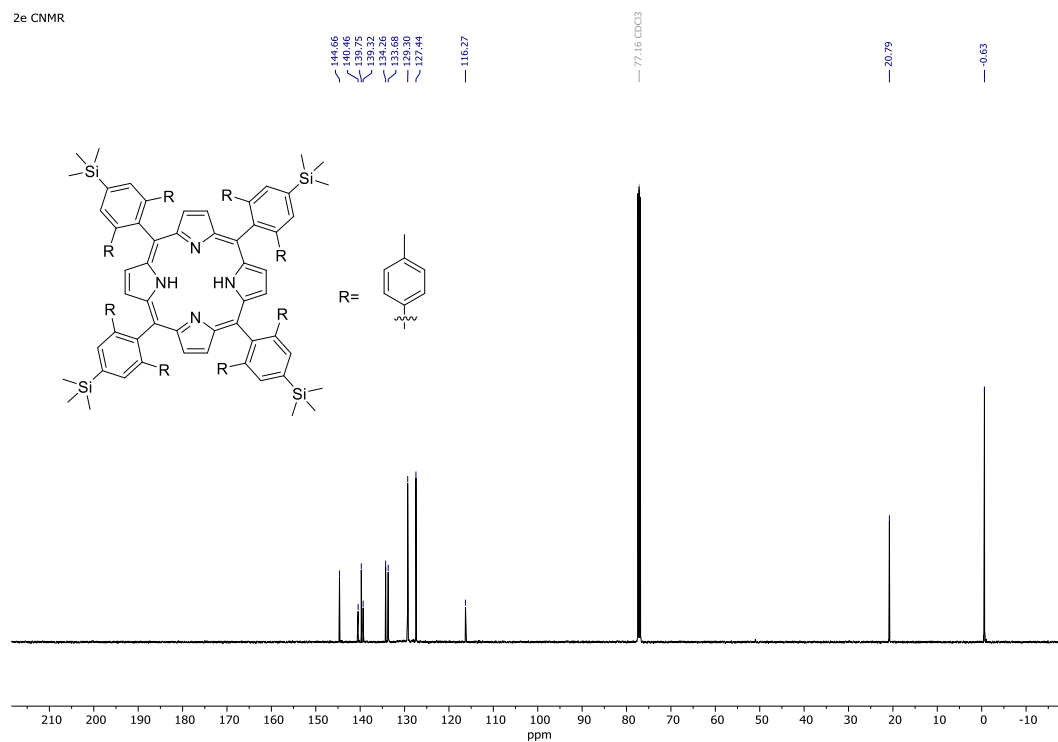

## 2f $^1\text{H}$ NMR (500 MHz, $\text{CDCl}_3$ )

2f HNMR

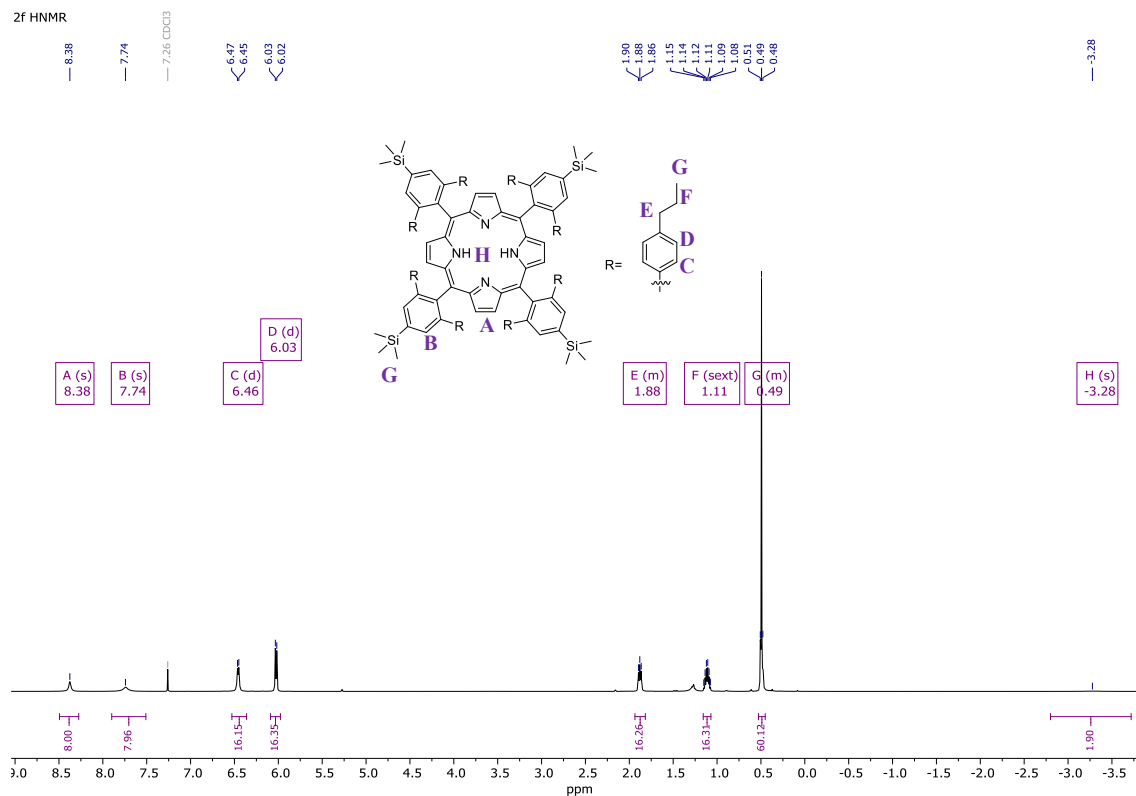

## 2f $^{13}\text{C}\{^1\text{H}\}$ NMR (126 MHz, $\text{CDCl}_3$ )

2f CNMR

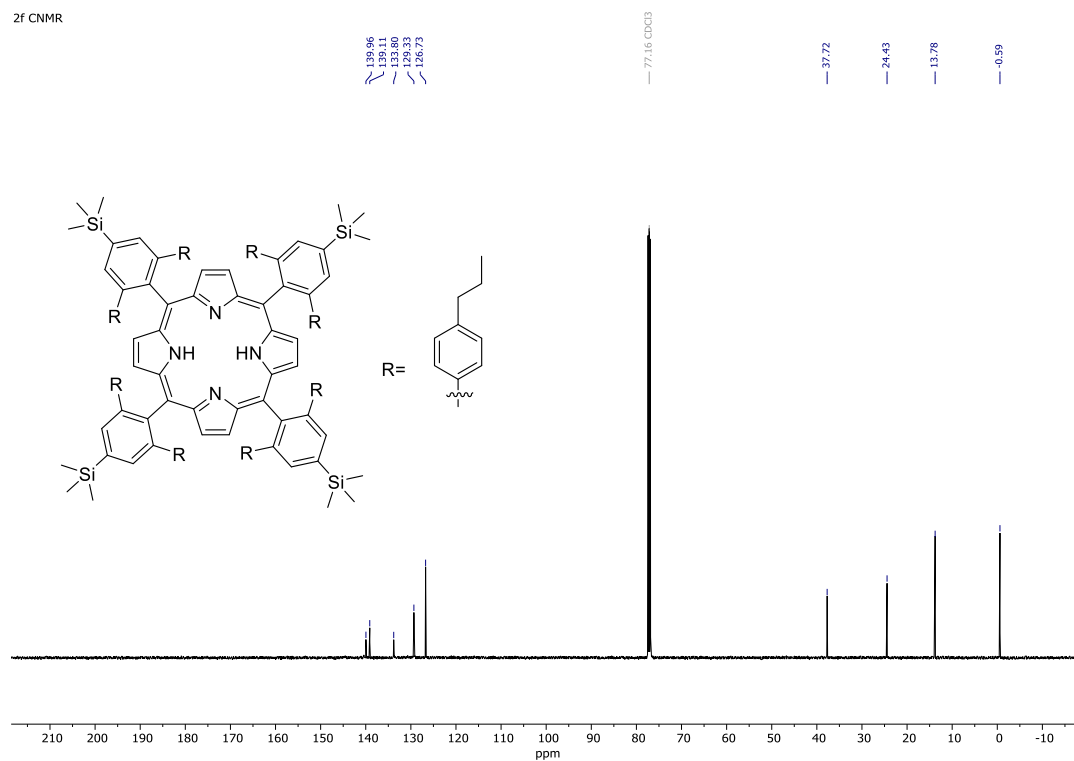

## 2g $^1\text{H}$ NMR (500 MHz, $\text{CDCl}_3$ )

2g HNMR

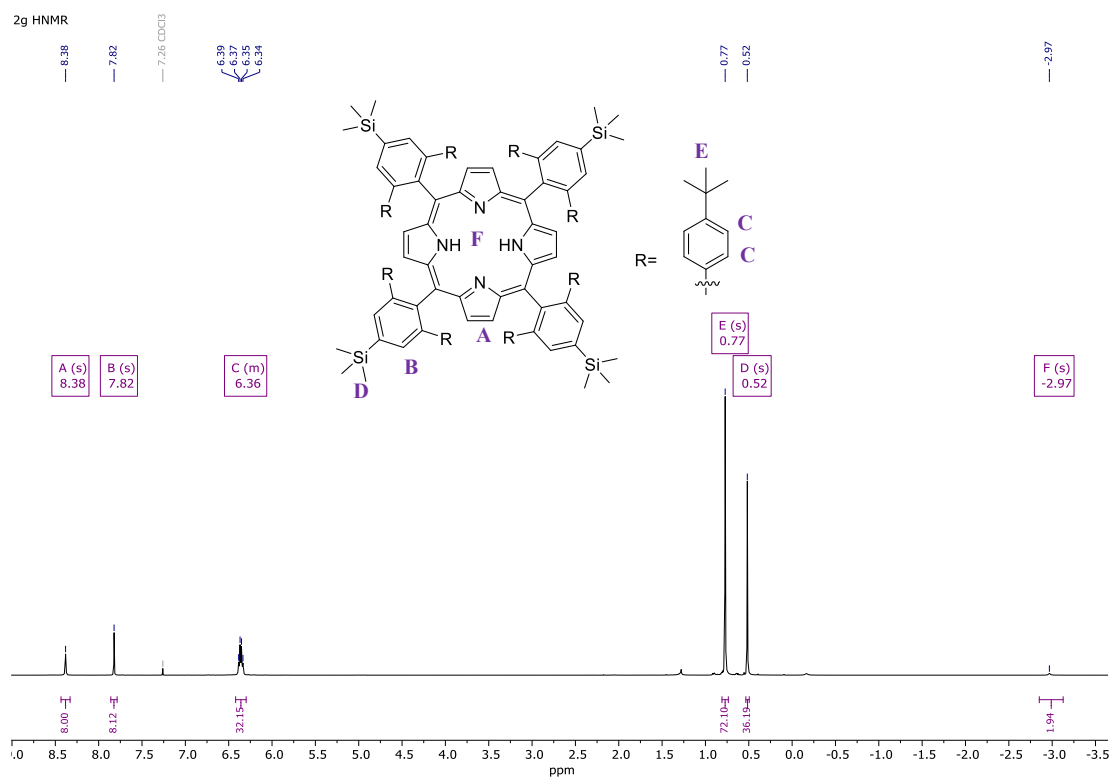

## 2g $^{13}\text{C}\{^1\text{H}\}$ NMR (126 MHz, $\text{CDCl}_3$ )

2g CNMR

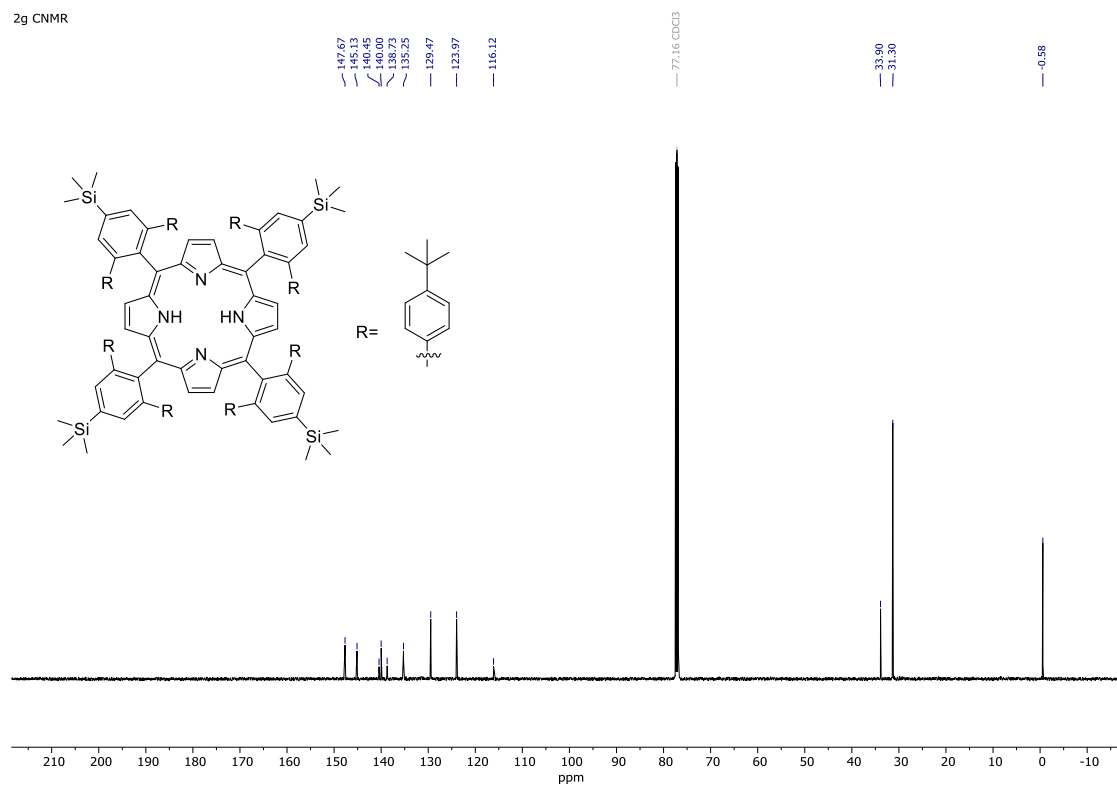

## 2h $^1\text{H}$ NMR (500 MHz, $\text{CDCl}_3$ )

2h HNMR

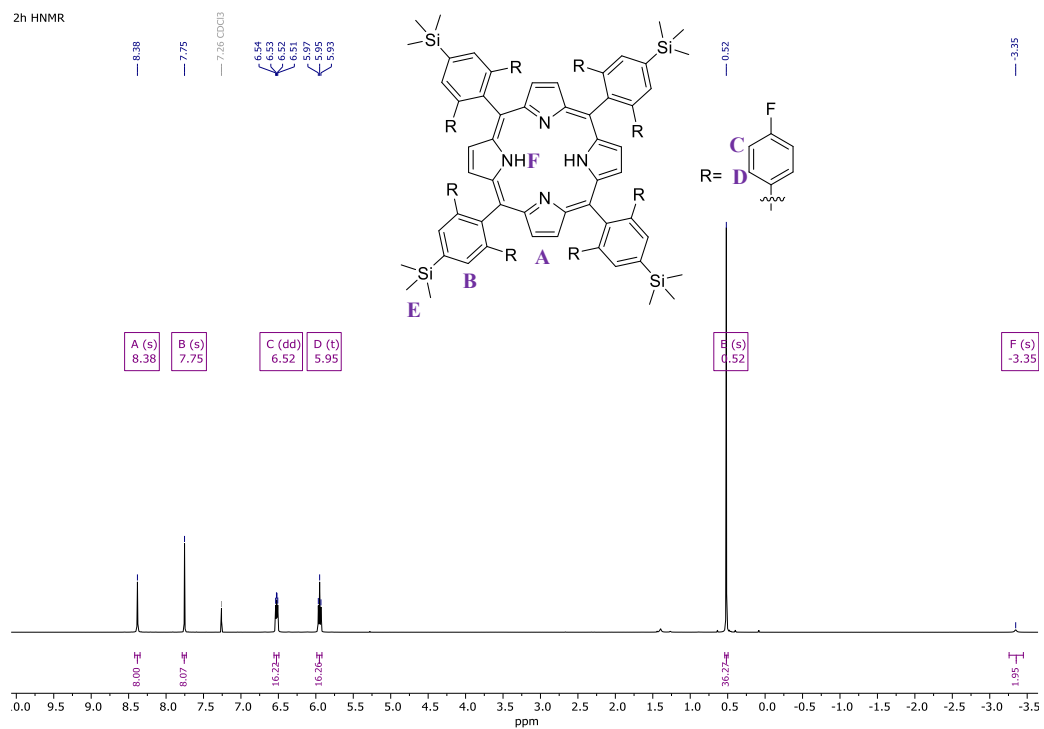

## 2h $^{13}\text{C}\{^1\text{H}\}$ NMR (126 MHz, $\text{CDCl}_3$ )

2h CNMR

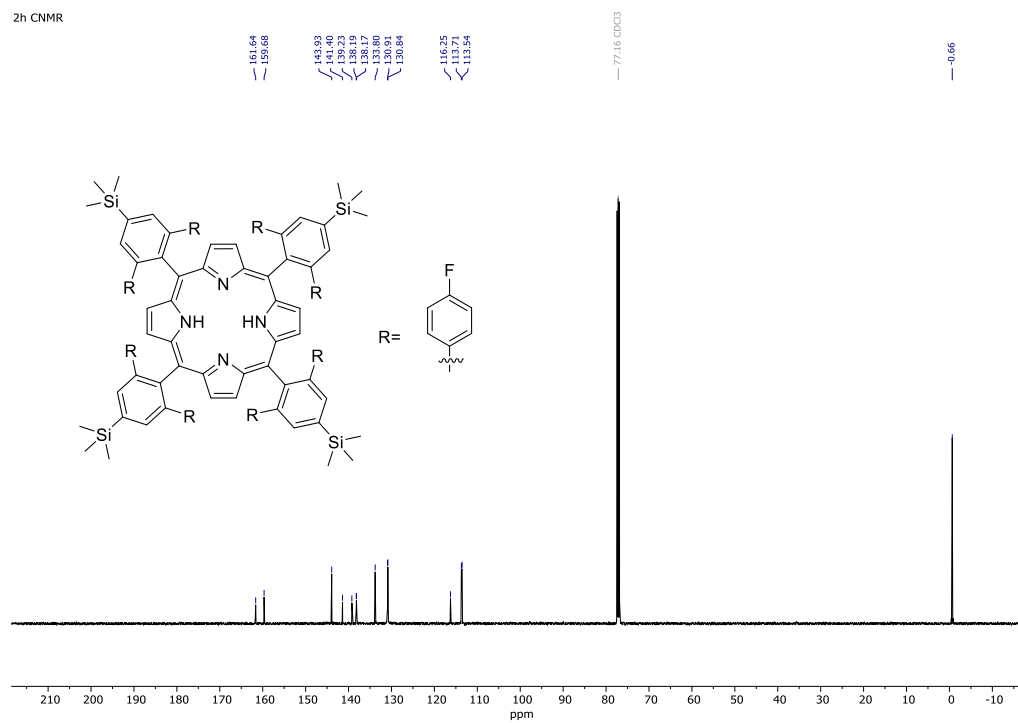

## 2h $^{19}\text{F}\{^1\text{H}\}$ NMR (470 MHz, $\text{CDCl}_3$ )

2h FNMR

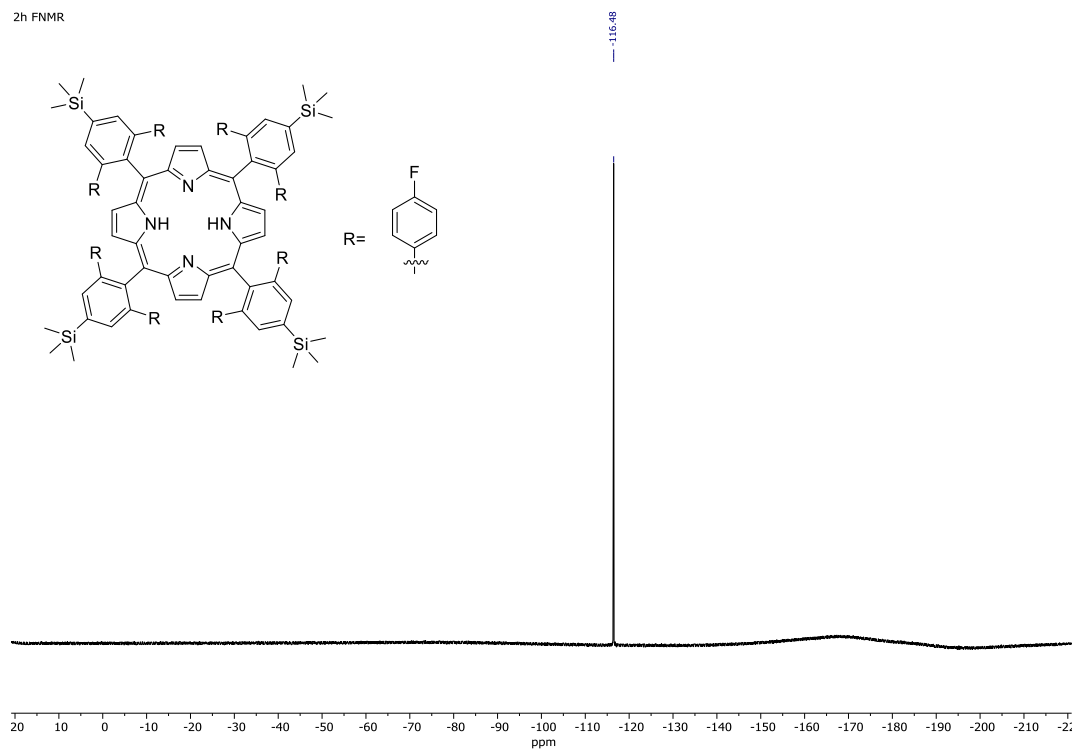

## 2i <sup>1</sup>H NMR (500 MHz, CDCl<sub>3</sub>)

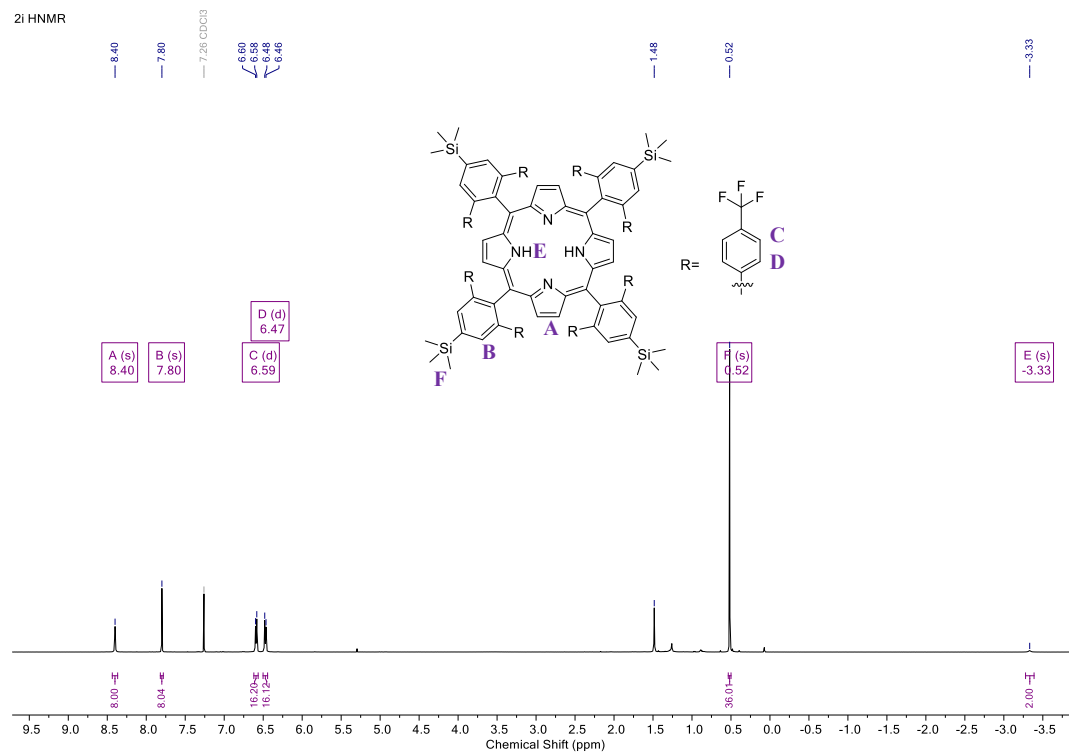

## 2i <sup>19</sup>F{<sup>1</sup>H} NMR (470 MHz, CDCl<sub>3</sub>)

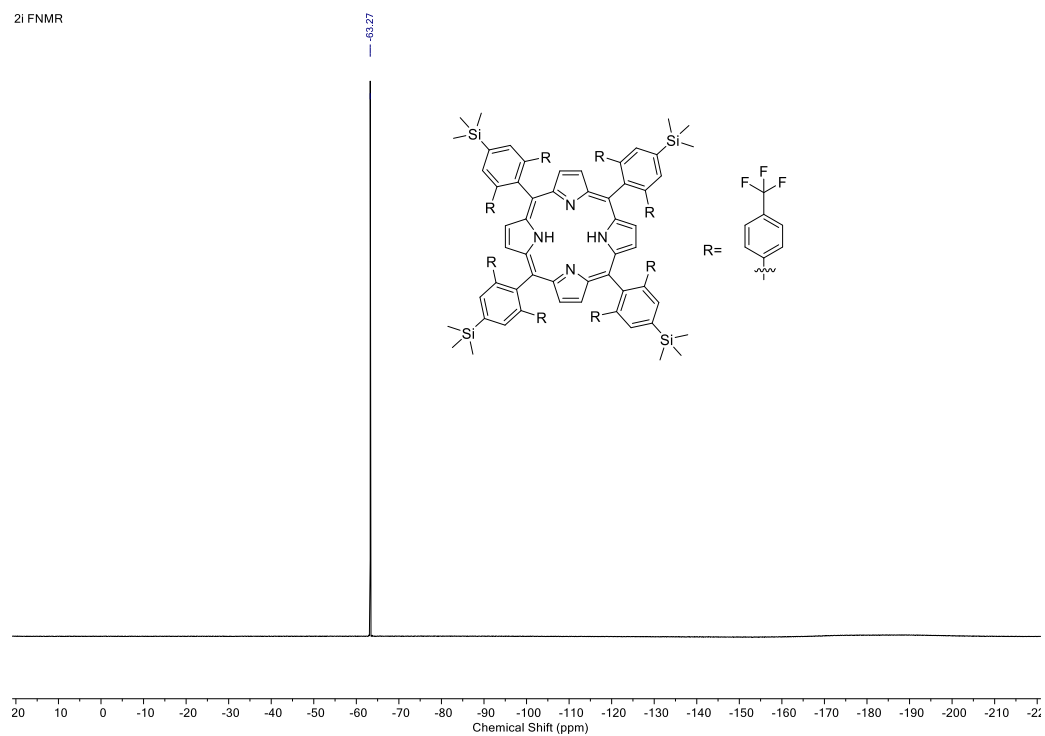

## 2i <sup>13</sup>C{<sup>1</sup>H} NMR (126 MHz, CDCl<sub>3</sub>)

2i CNMR

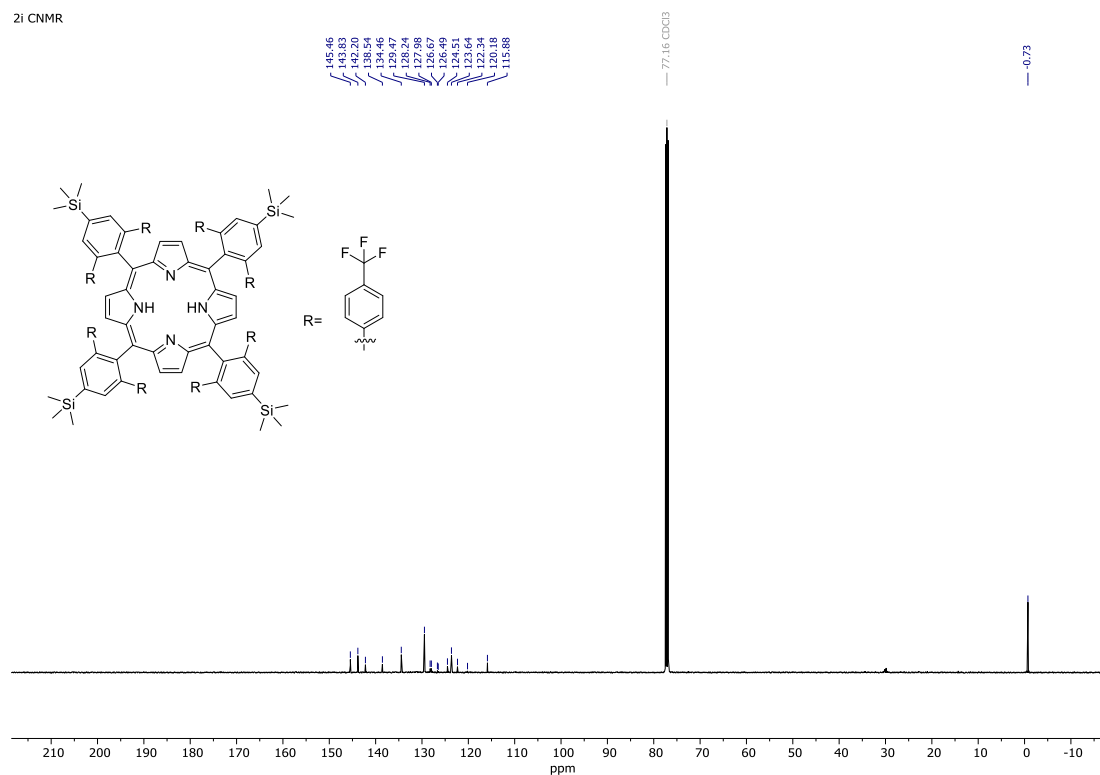

## 2j <sup>1</sup>H NMR (500 MHz, CDCl<sub>3</sub>)

2j HNMR

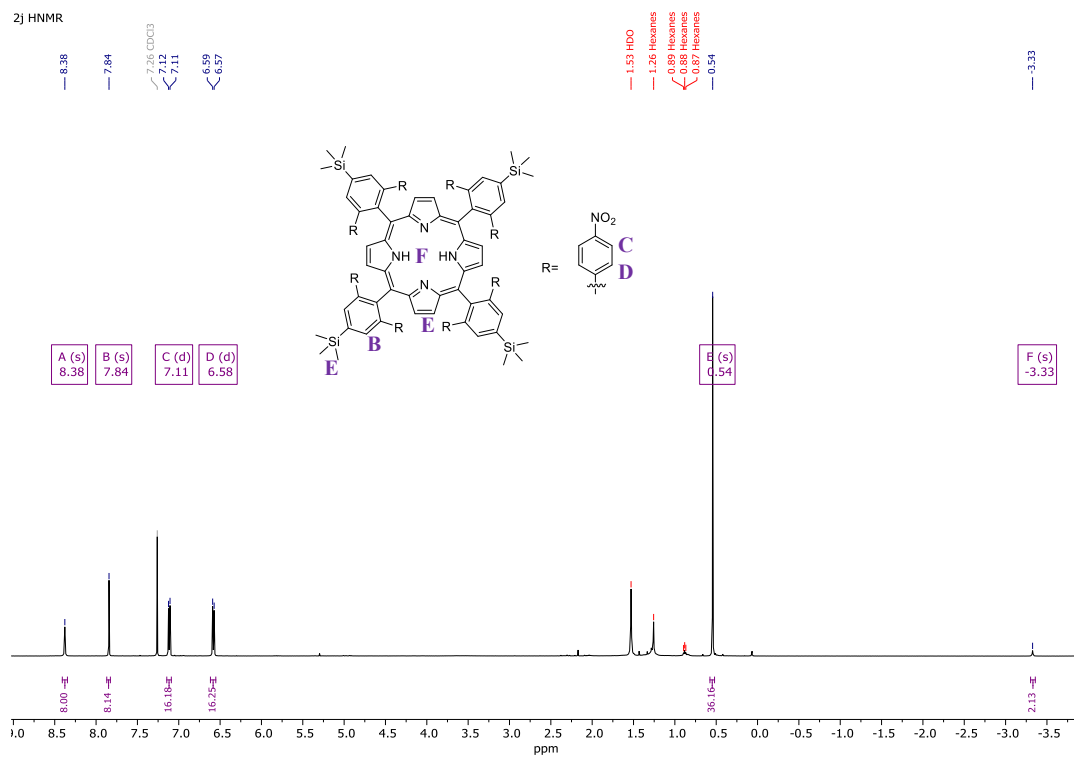

## 2j $^{13}\text{C}\{^1\text{H}\}$ NMR (126 MHz, $\text{CDCl}_3$ )

2j CNMR

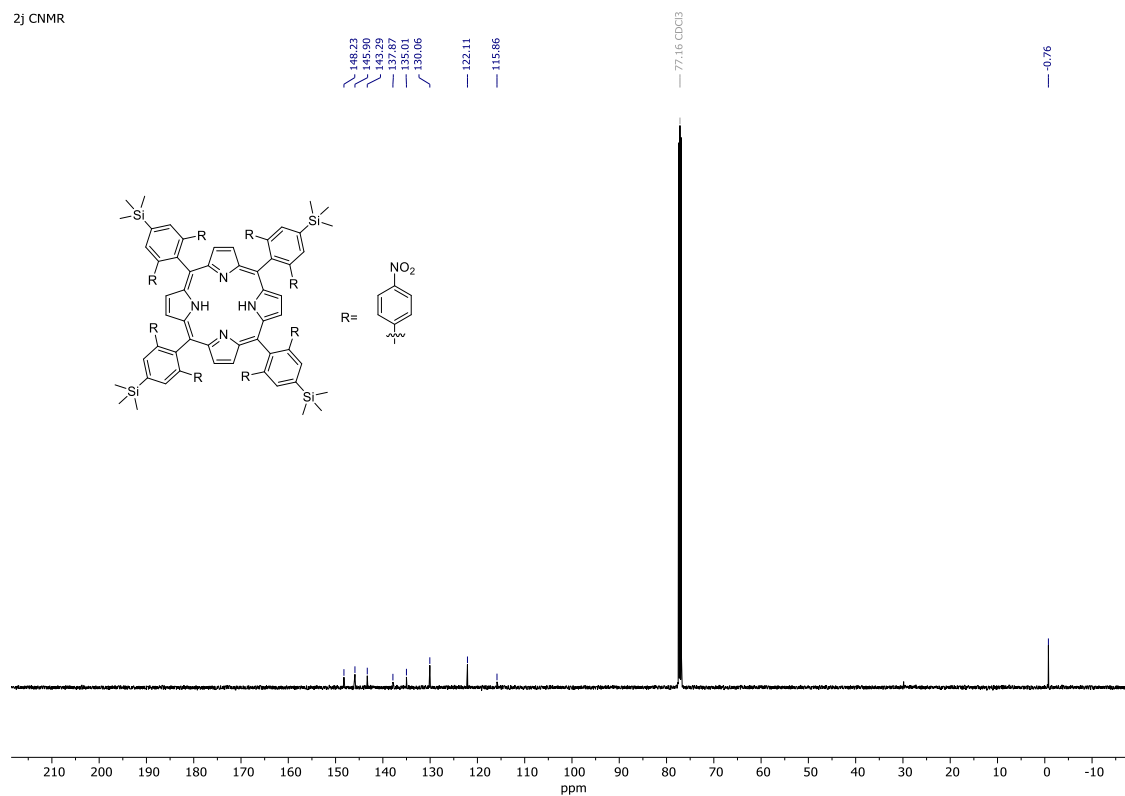

## 2k $^1\text{H}$ NMR (500 MHz, $\text{CDCl}_3$ )

2k HNMR

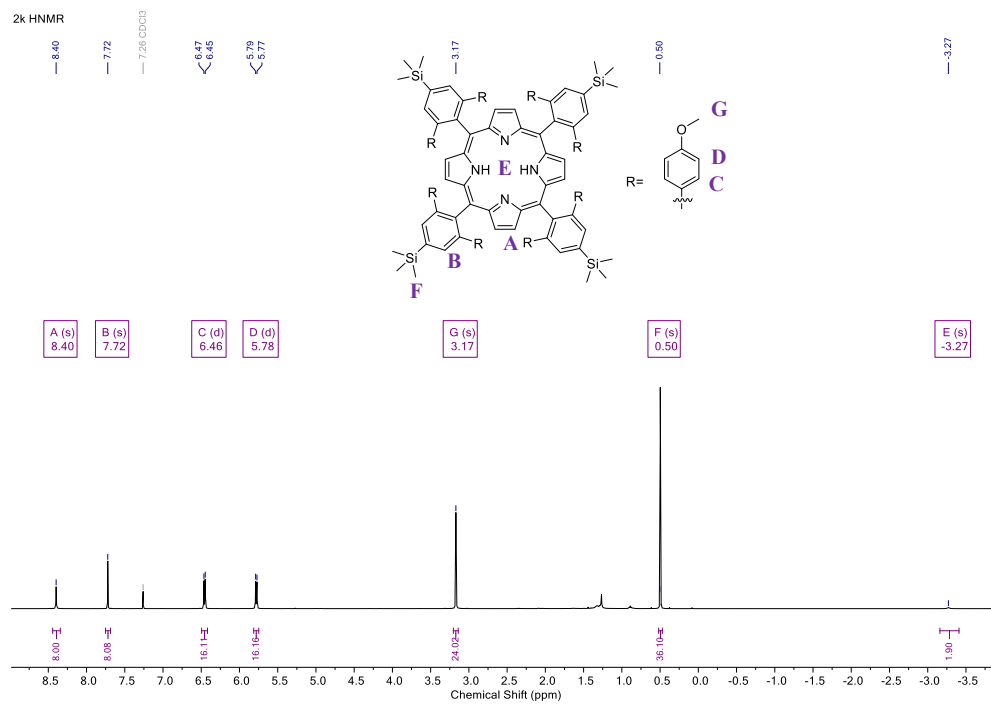

## 2k $^{13}\text{C}\{^1\text{H}\}$ NMR (126 MHz, $\text{CDCl}_3$ )

2k CNMR

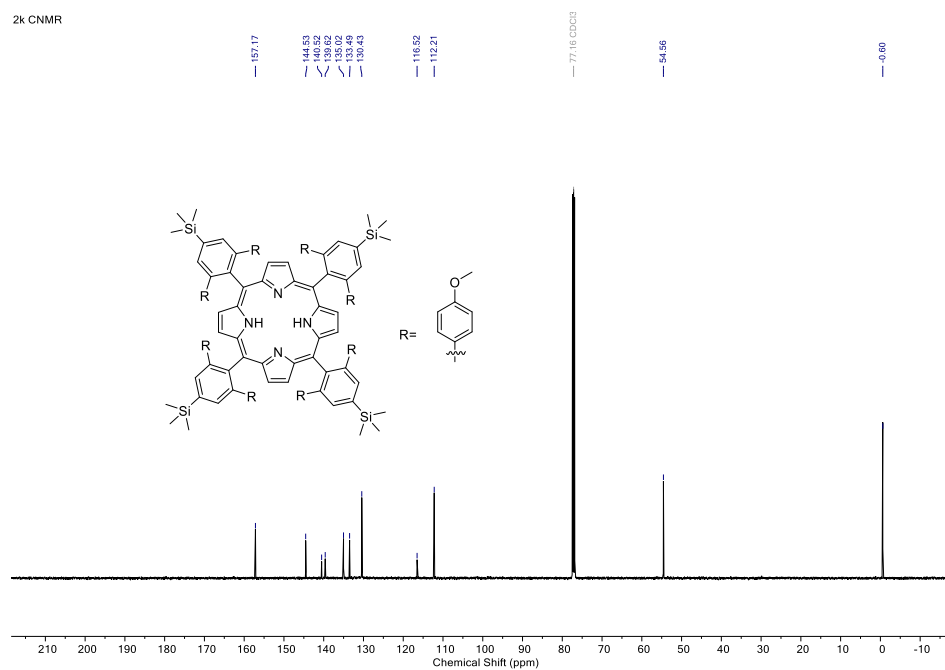

## 2l $^1\text{H}$ NMR (500 MHz, $\text{CDCl}_3$ ) (\* tentative assignment)

2l HNMR

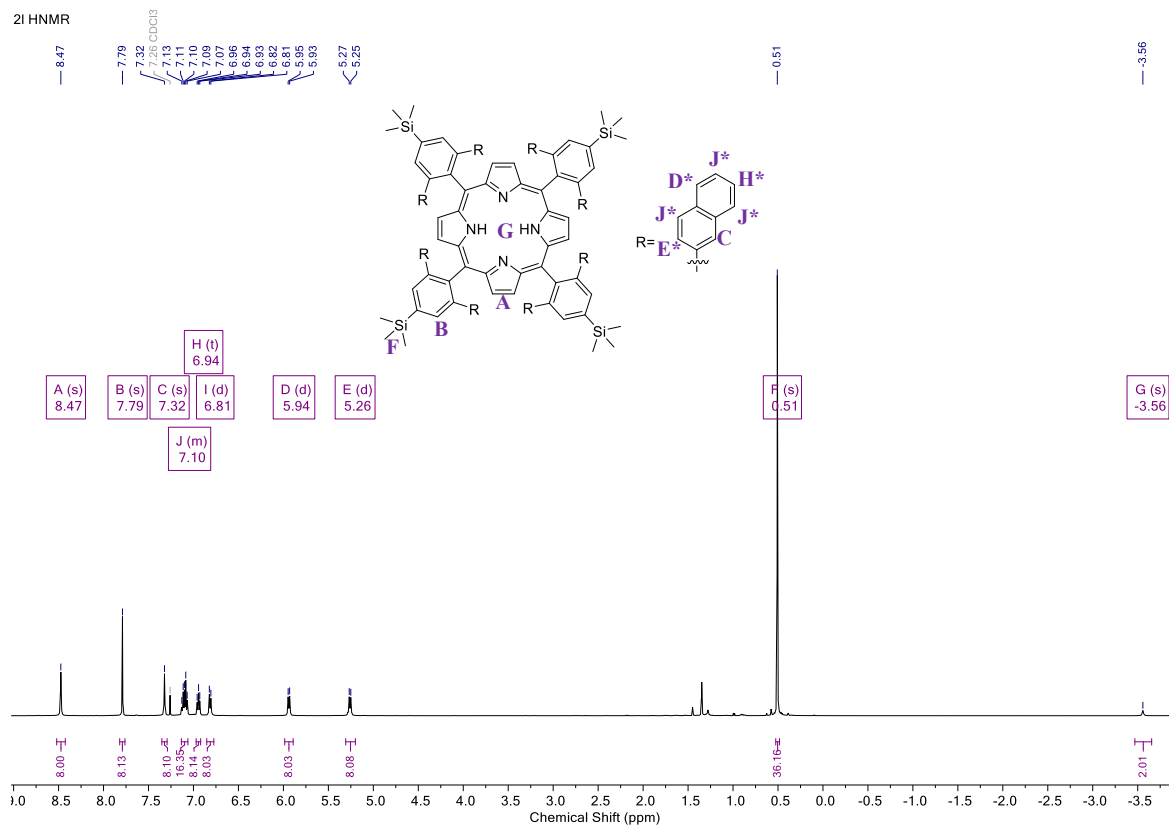



## 2l $^{13}\text{C}\{^1\text{H}\}$ NMR (126 MHz, $\text{CDCl}_3$ )

2l CNMR

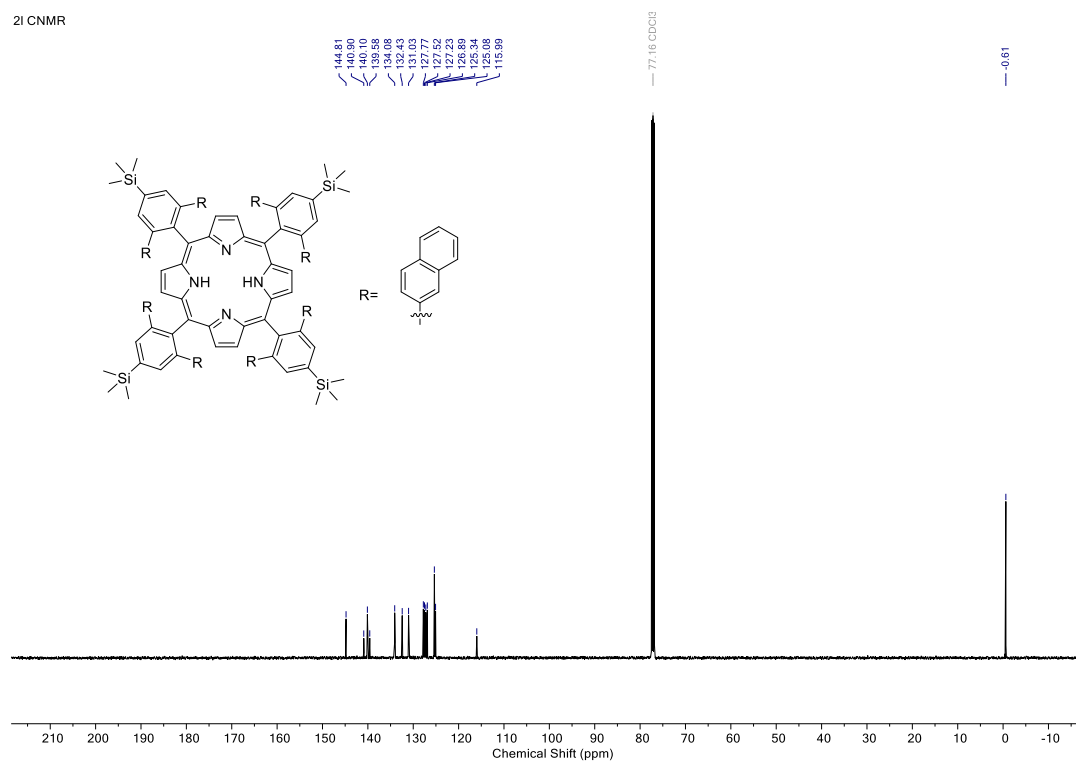

## 2m $^1\text{H}$ NMR (500 MHz, $\text{CDCl}_3$ )

2m HNMR

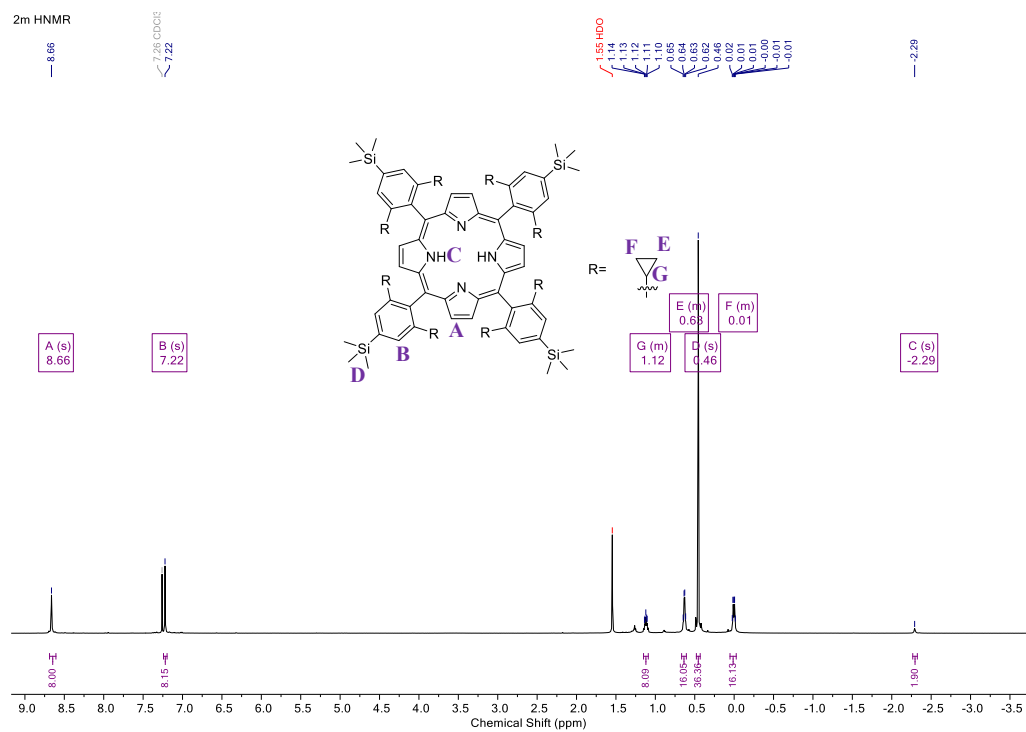

## 2m $^{13}\text{C}\{^1\text{H}\}$ NMR (126 MHz, $\text{CDCl}_3$ )

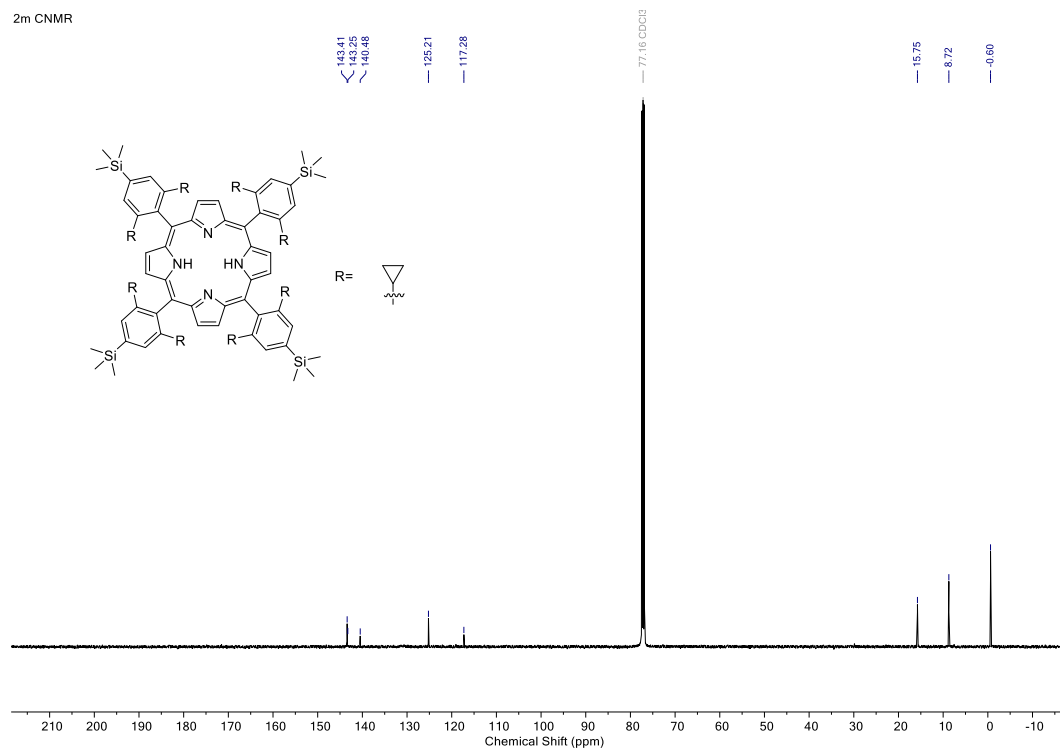

## 2n $^1\text{H}$ NMR (500 MHz, $\text{CDCl}_3$ )

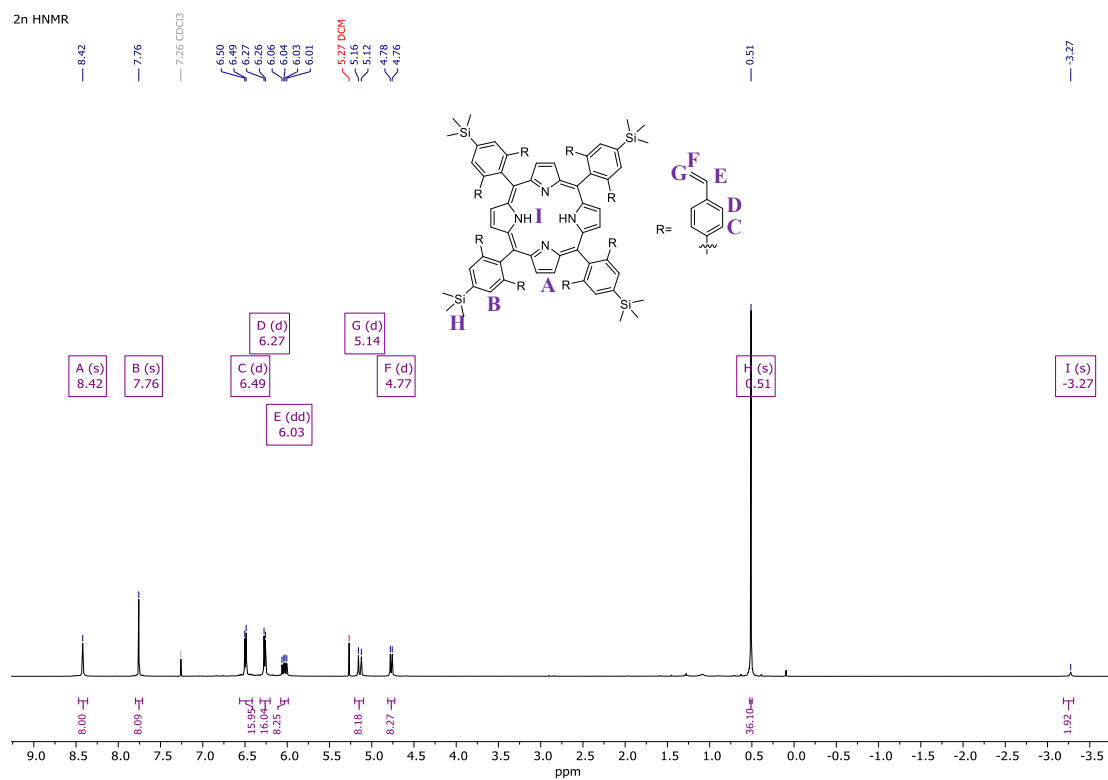

## 2n $^{13}\text{C}\{^1\text{H}\}$ NMR (126 MHz, $\text{CDCl}_3$ )

2n CNMR

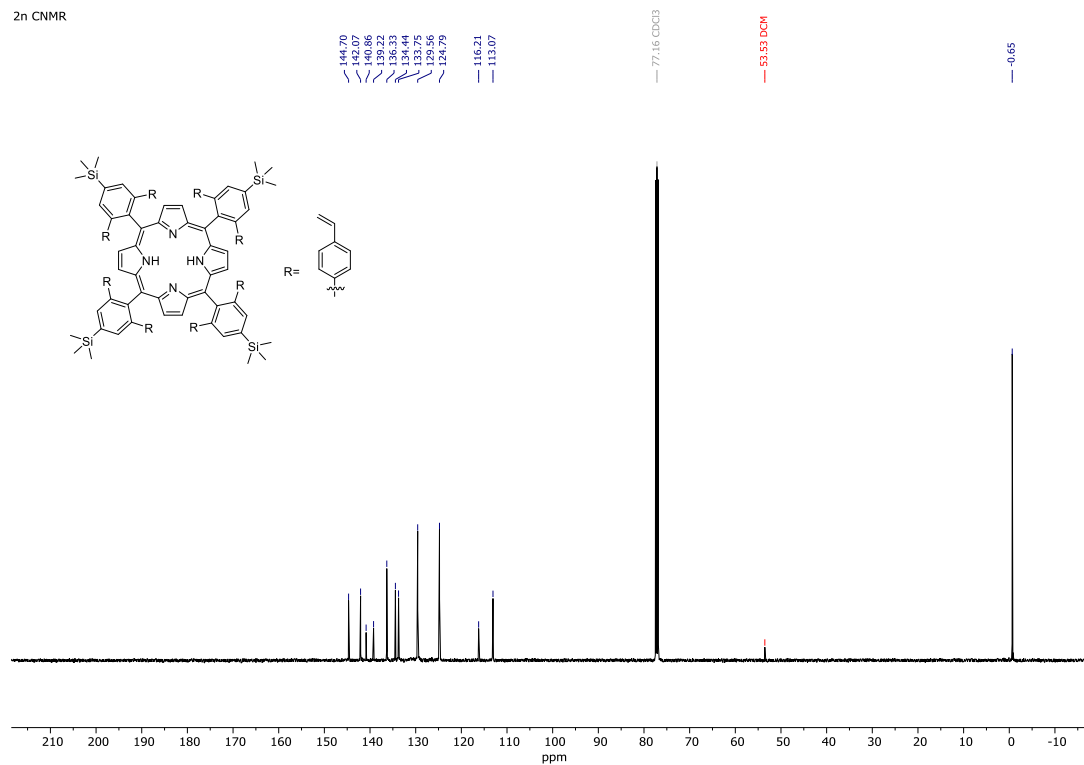

## 2o $^1\text{H}$ NMR (500 MHz, $\text{CDCl}_3$ )

2o HNMR

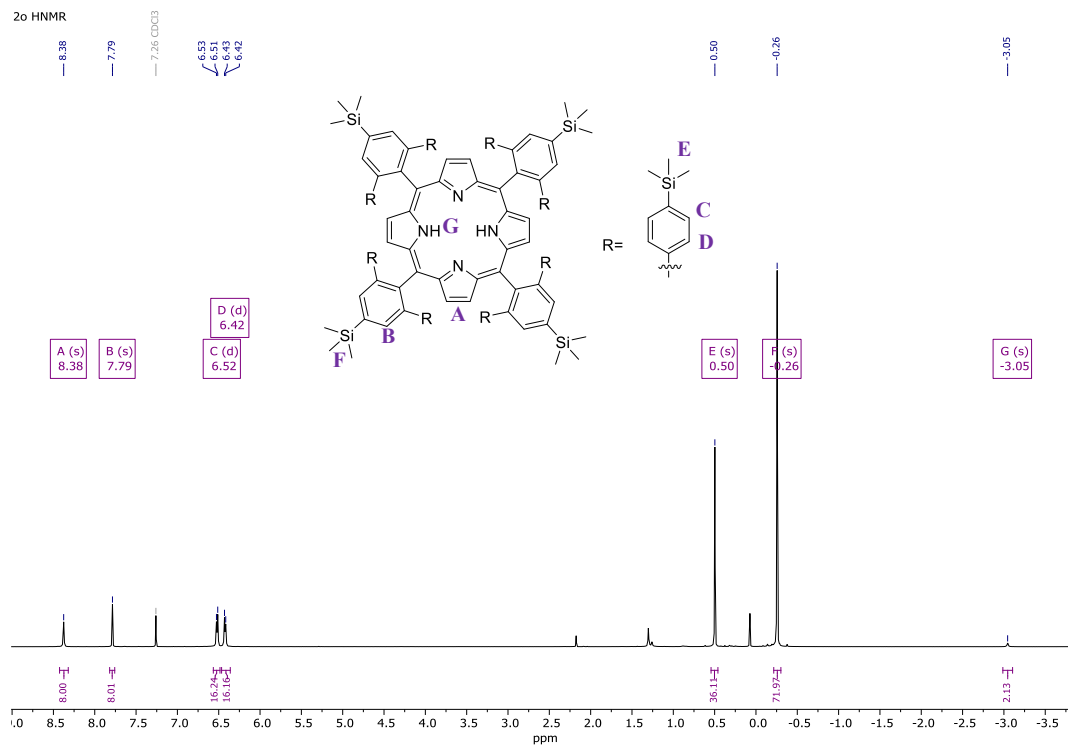

## 2o $^{13}\text{C}\{^1\text{H}\}$ NMR (126 MHz, $\text{CDCl}_3$ )

2o CNMR

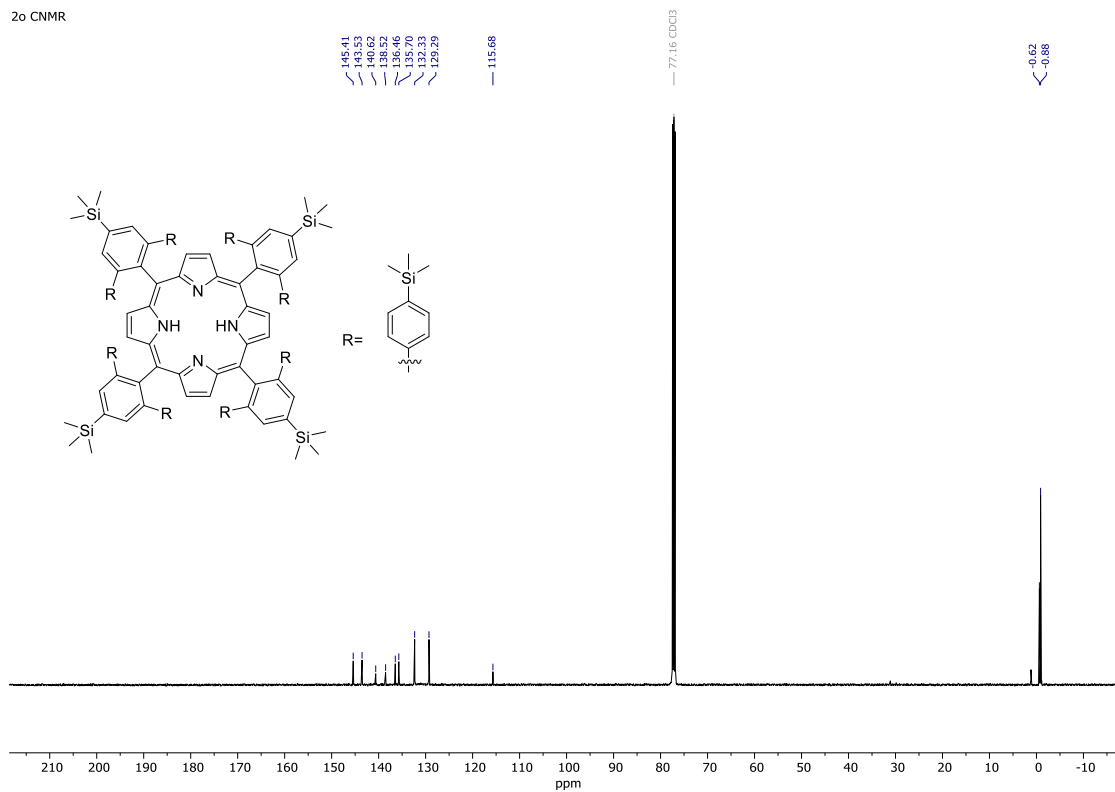

## 2p $^1\text{H}$ NMR (500 MHz, $\text{CDCl}_3$ )

2p HNMR

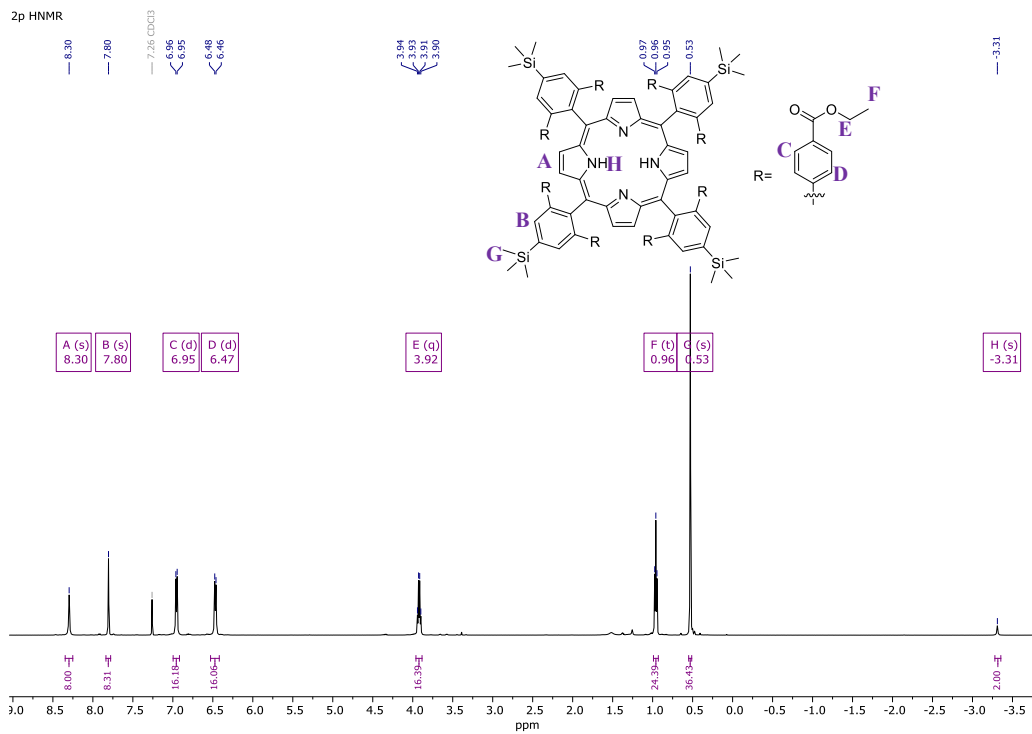

## 2p $^{13}\text{C}\{^1\text{H}\}$ NMR (126 MHz, $\text{CDCl}_3$ )

2p CNMR

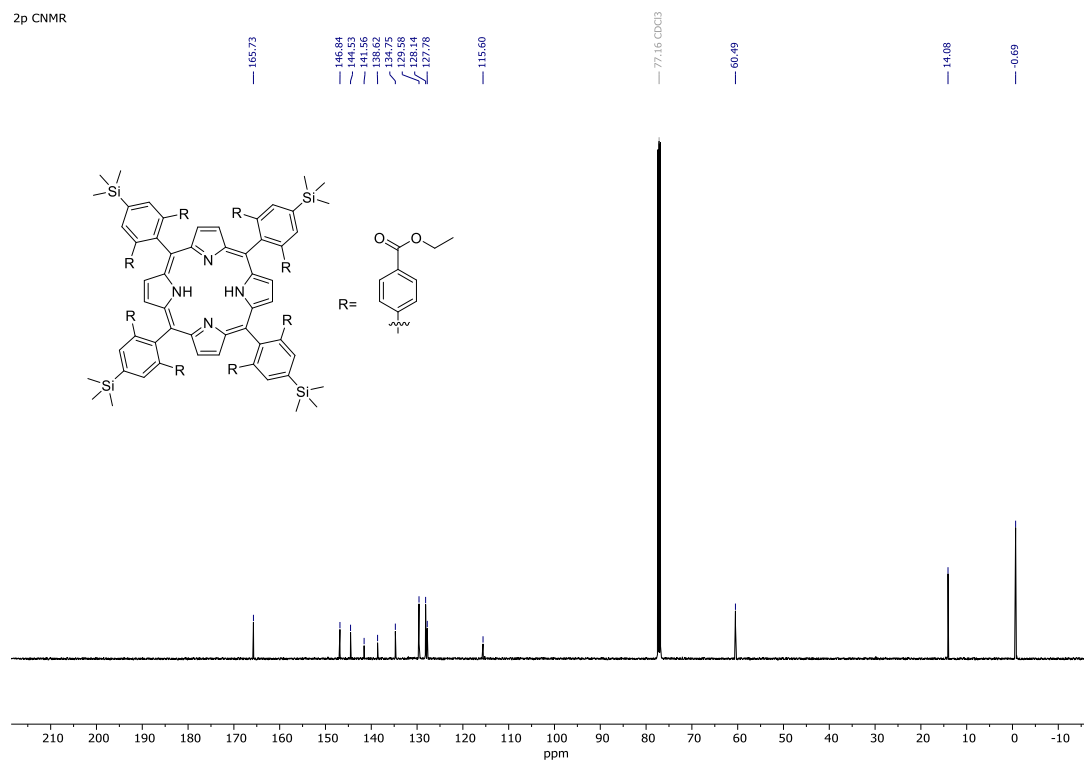

## 2q $^1\text{H}$ NMR (500 MHz, $\text{CDCl}_3$ )

2q HNMR

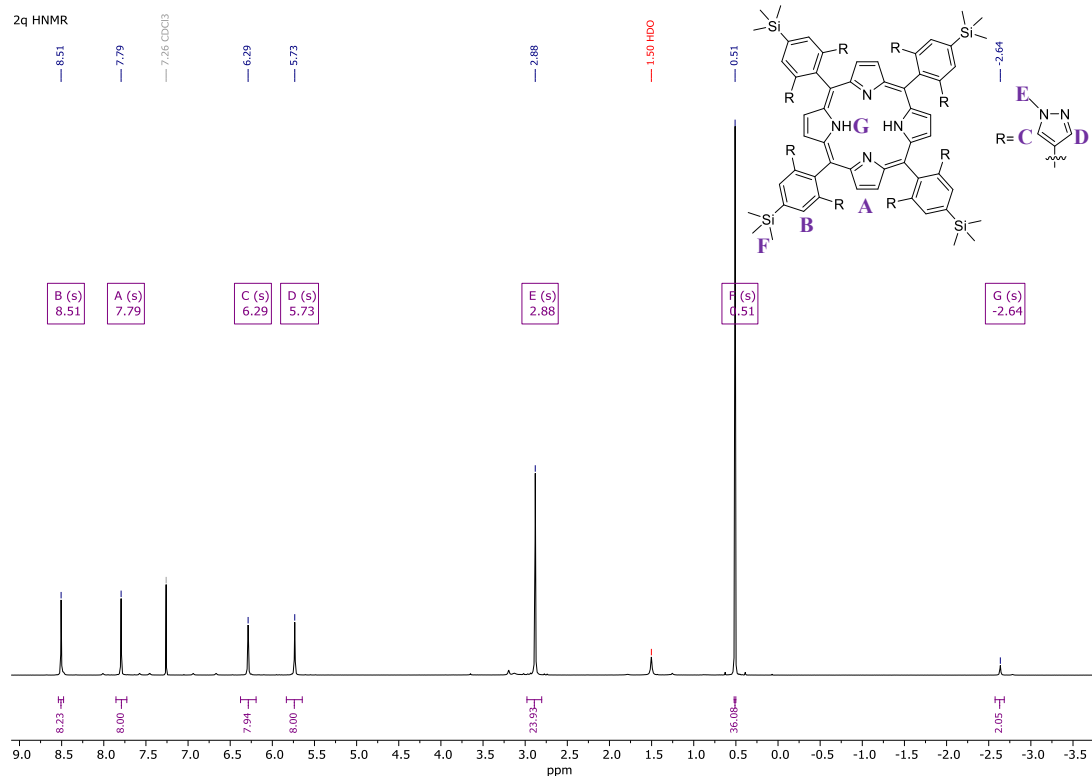

## 2q $^{13}\text{C}\{^1\text{H}\}$ NMR (126 MHz, $\text{CDCl}_3$ )

2q CNMR

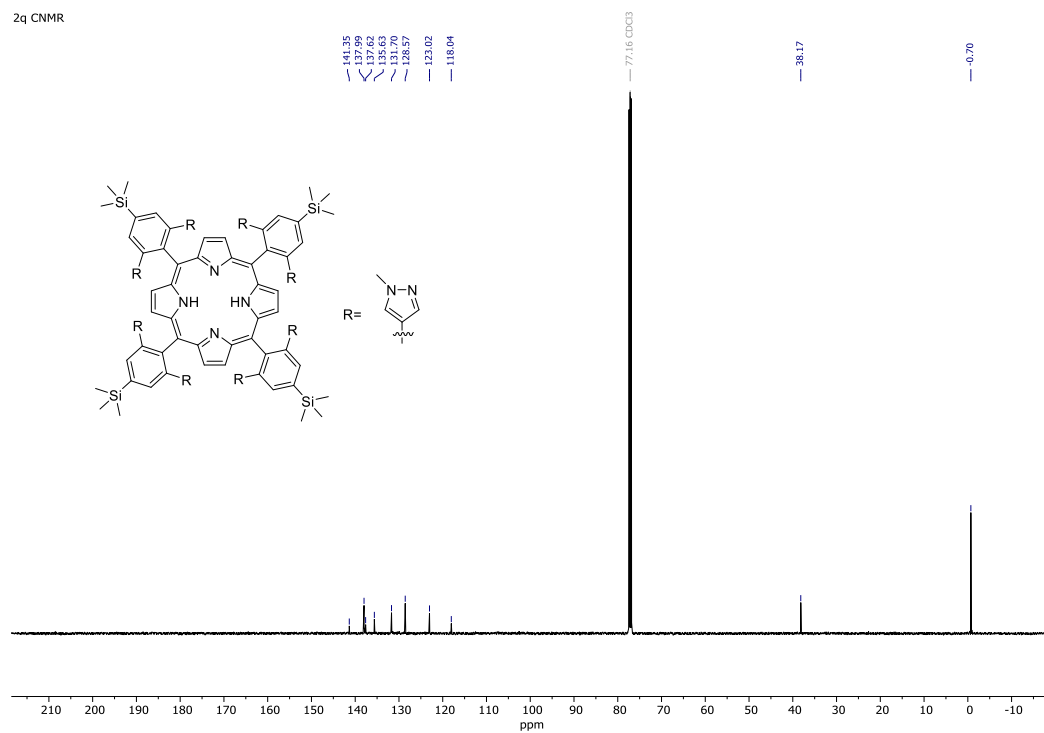

## NMRs Sulfonation

### 3a $^1\text{H}$ NMR (500 MHz, $\text{DMSO-d}_6$ )

3a HNMR

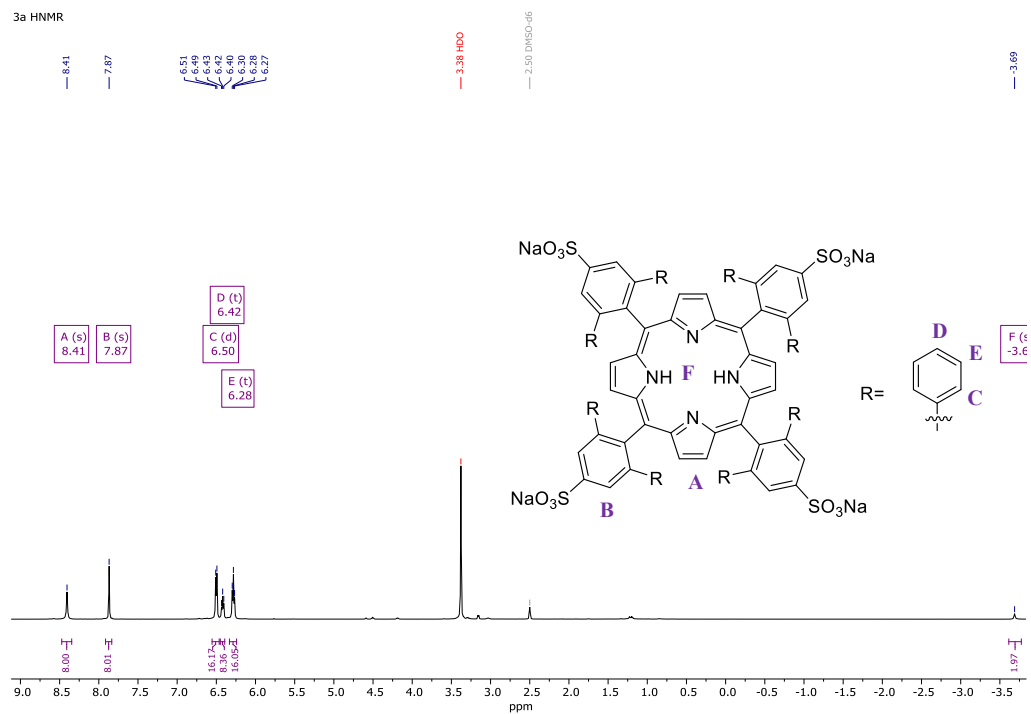

### 3a $^{13}\text{C}\{^1\text{H}\}$ NMR (126 MHz, DMSO- $d_6$ )

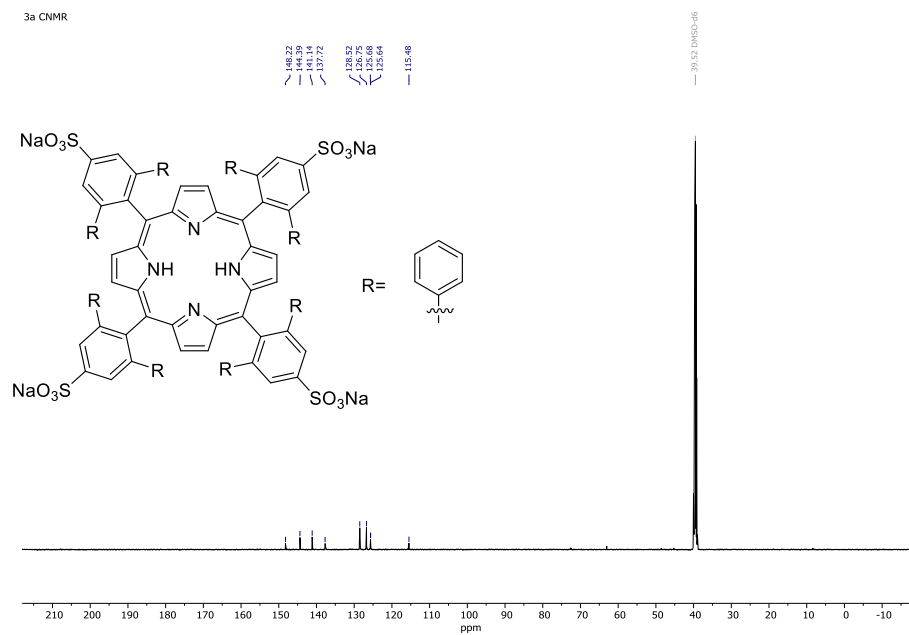

### 3b $^1\text{H}$ NMR (500 MHz, DMSO- $d_6$ )

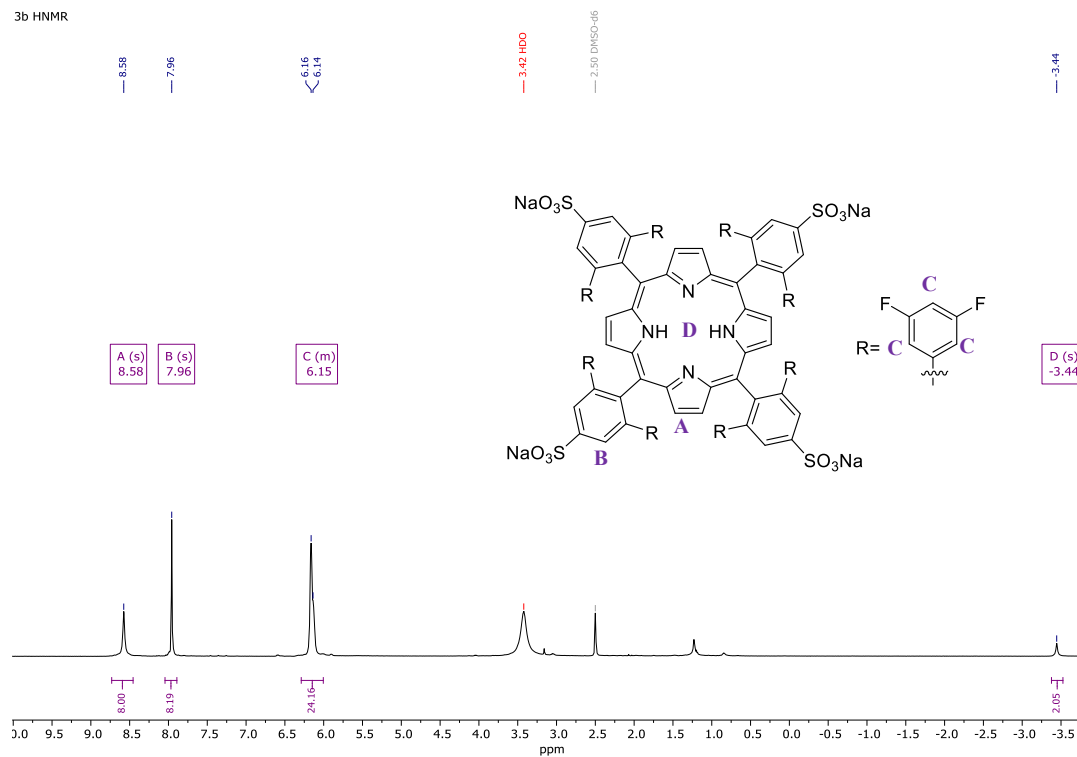

### 3b $^{19}\text{F}\{^1\text{H}\}$ NMR (470 MHz, DMSO- $d_6$ )

3b FNMR

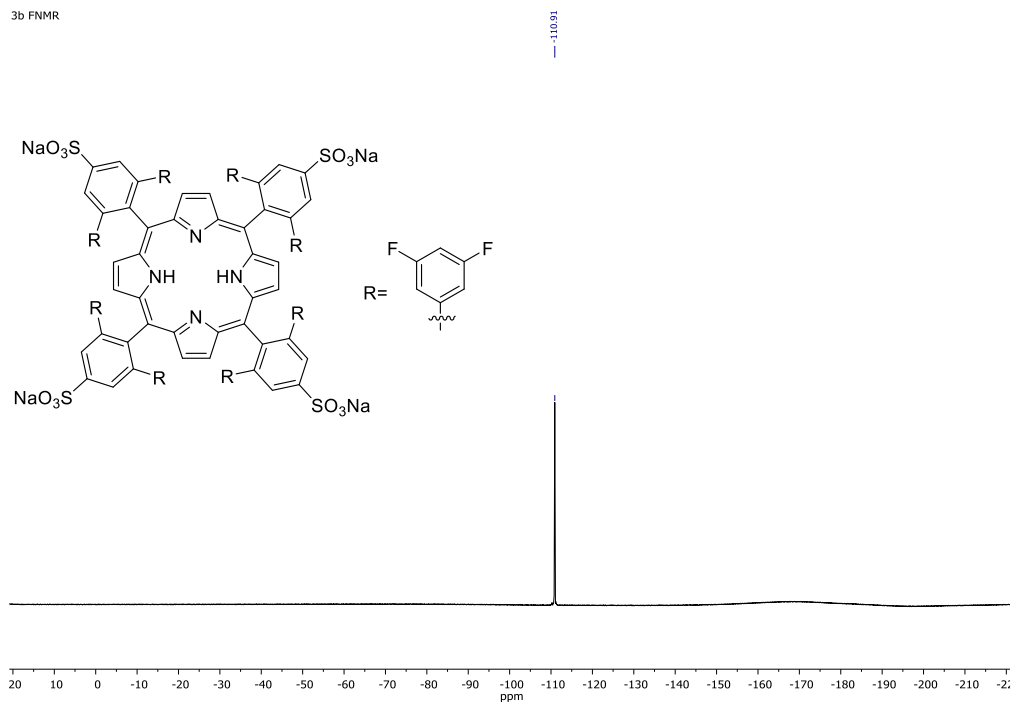

### 3b $^{13}\text{C}\{^1\text{H}\}$ NMR (126 MHz, DMSO- $d_6$ )

3b CNMR

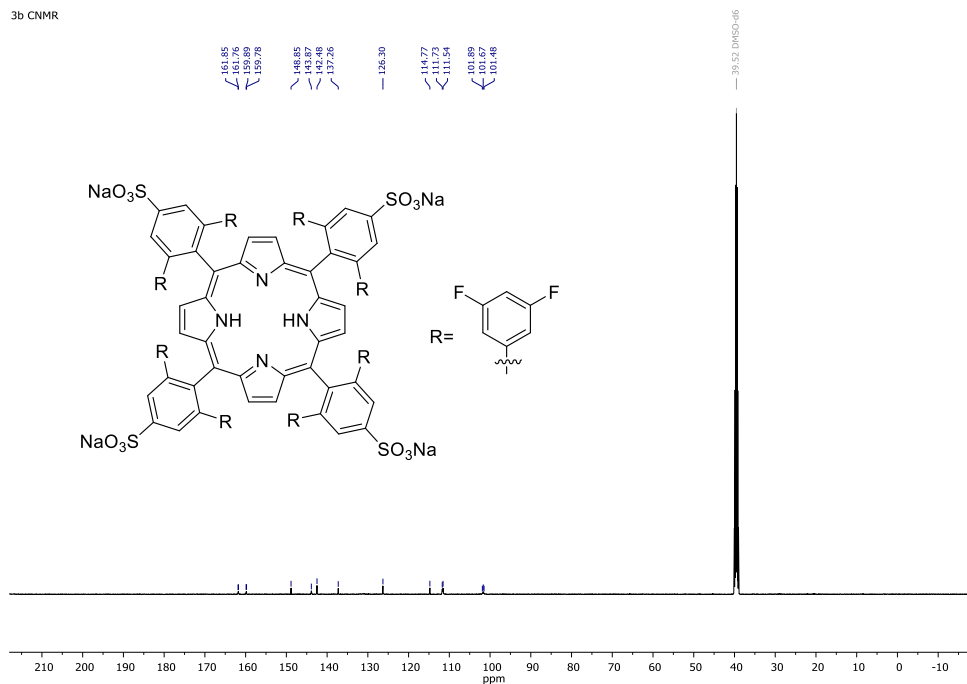



## NMRs Metalations

### 4a <sup>1</sup>H NMR (500 MHz, CDCl<sub>3</sub>)

4a HNMR

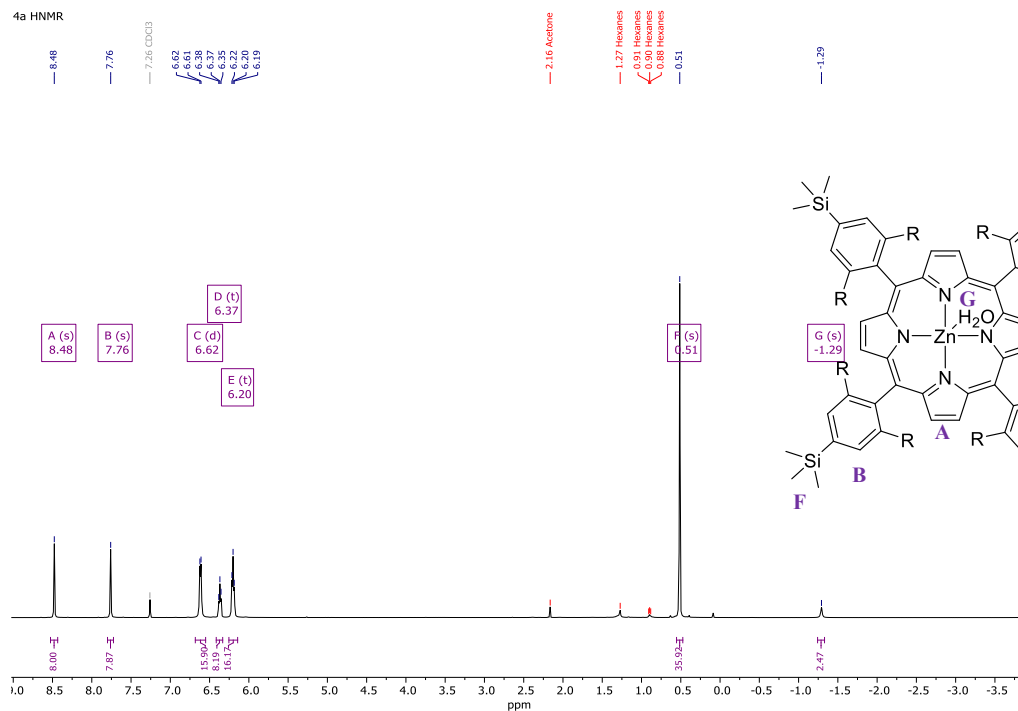

### 4a <sup>13</sup>C{<sup>1</sup>H} NMR (126 MHz, CDCl<sub>3</sub>)

4a CNMR

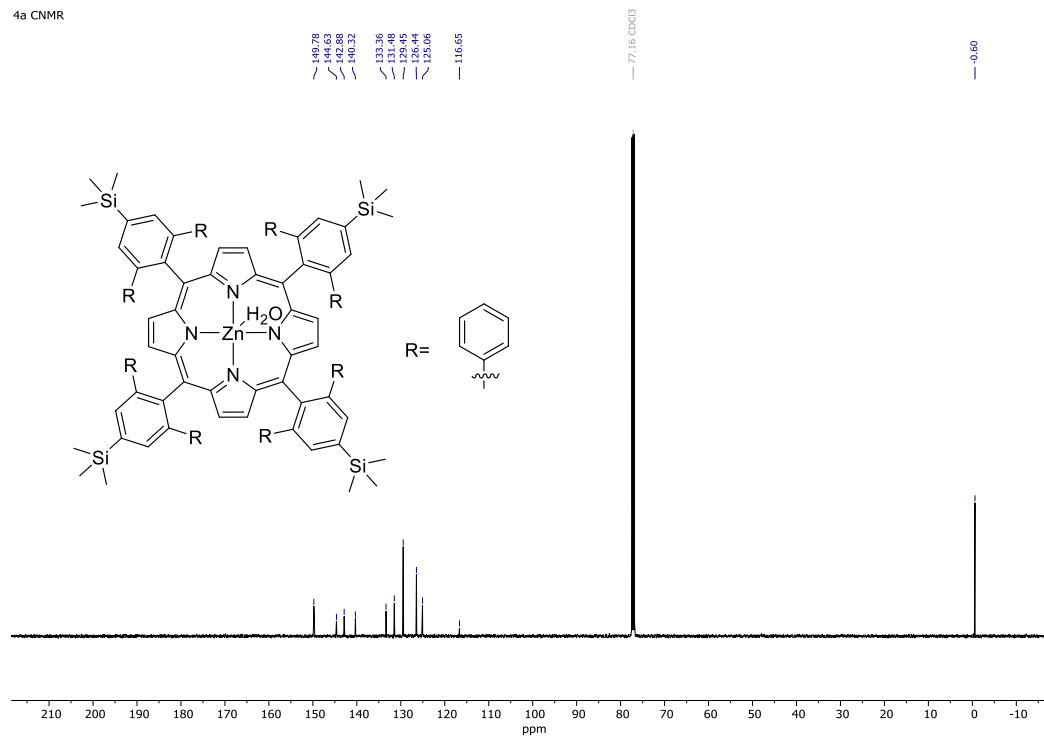

### 4b <sup>1</sup>H NMR (500 MHz, CDCl<sub>3</sub>) (n.b. paramagnetic)

4b HNMR

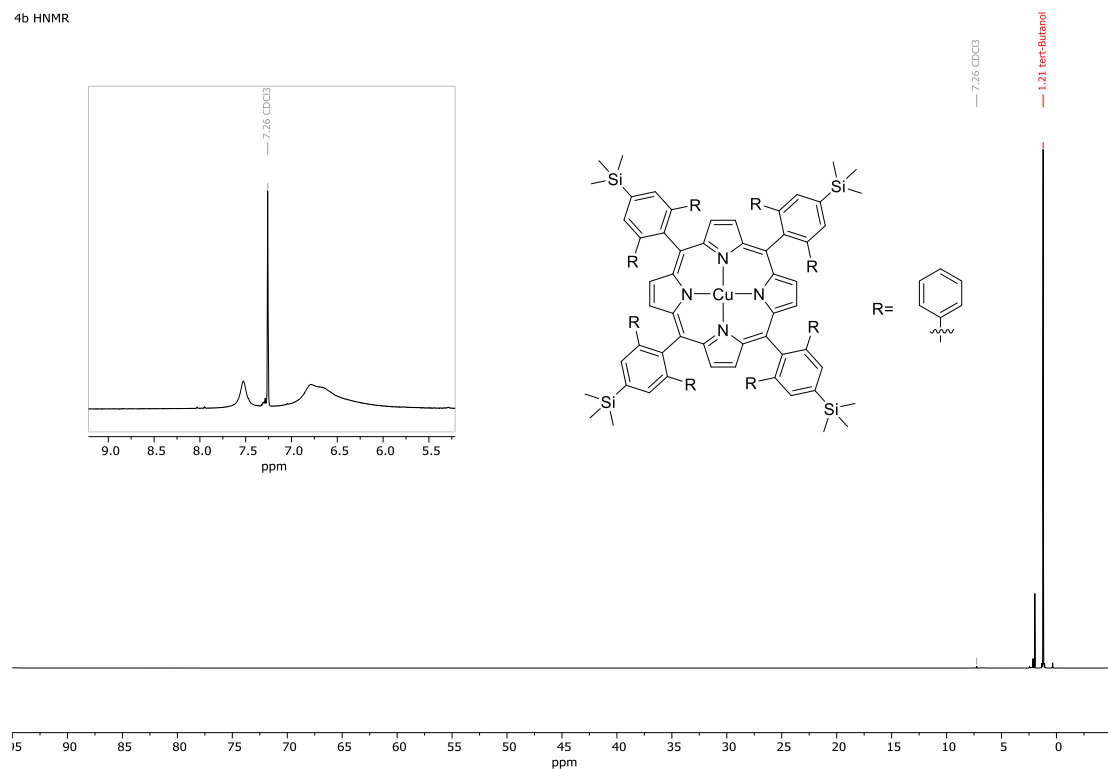

### 4c <sup>1</sup>H NMR (500 MHz, CDCl<sub>3</sub>)

4c HNMR

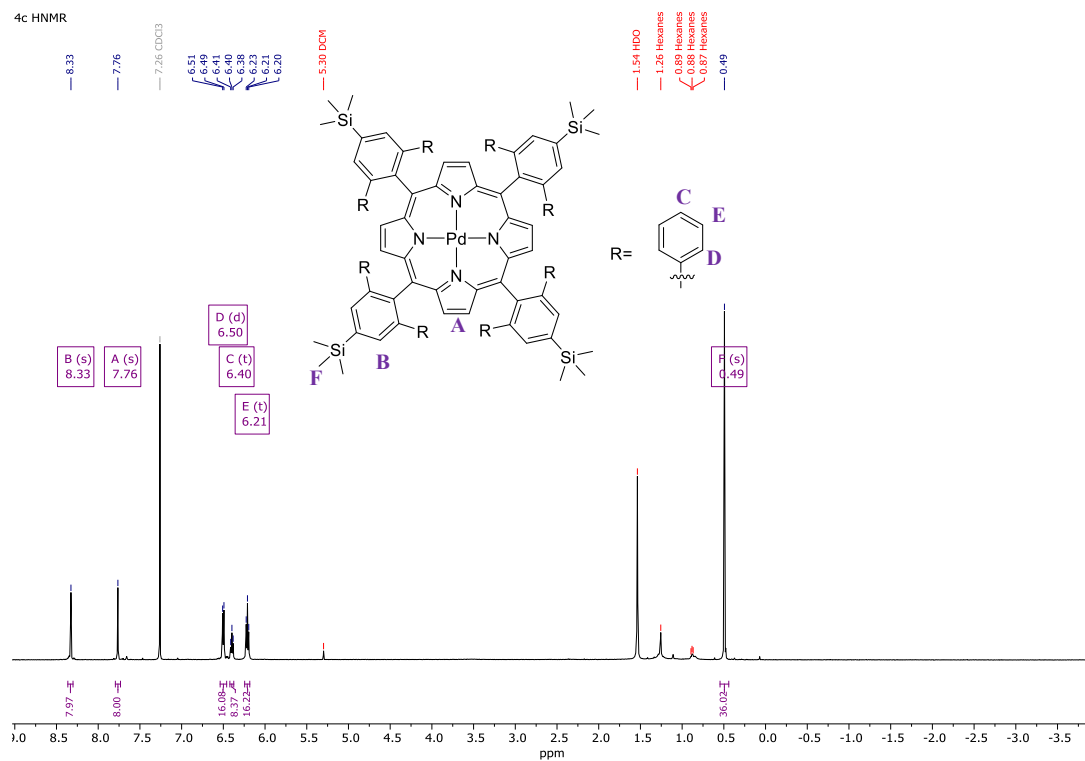

### 4c $^{13}\text{C}\{^1\text{H}\}$ NMR (126 MHz, $\text{CDCl}_3$ )

4c CNMR

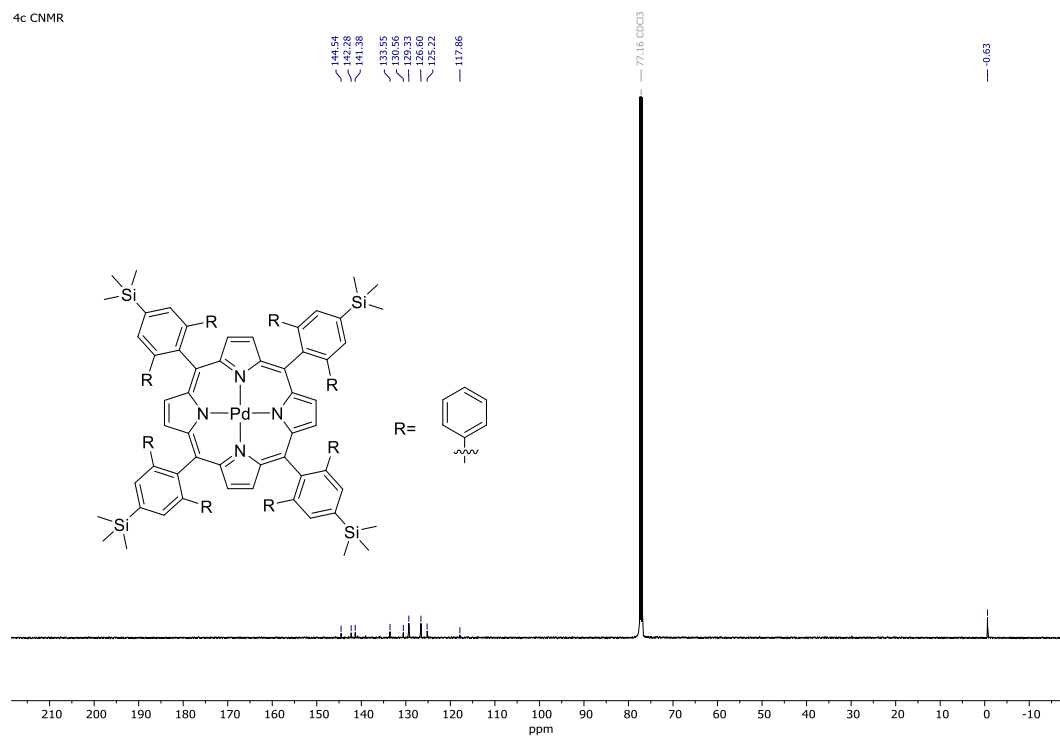

### 4d $^1\text{H}$ NMR (500 MHz, $\text{CDCl}_3$ ) (n.b. paramagnetic)

4d HNMR

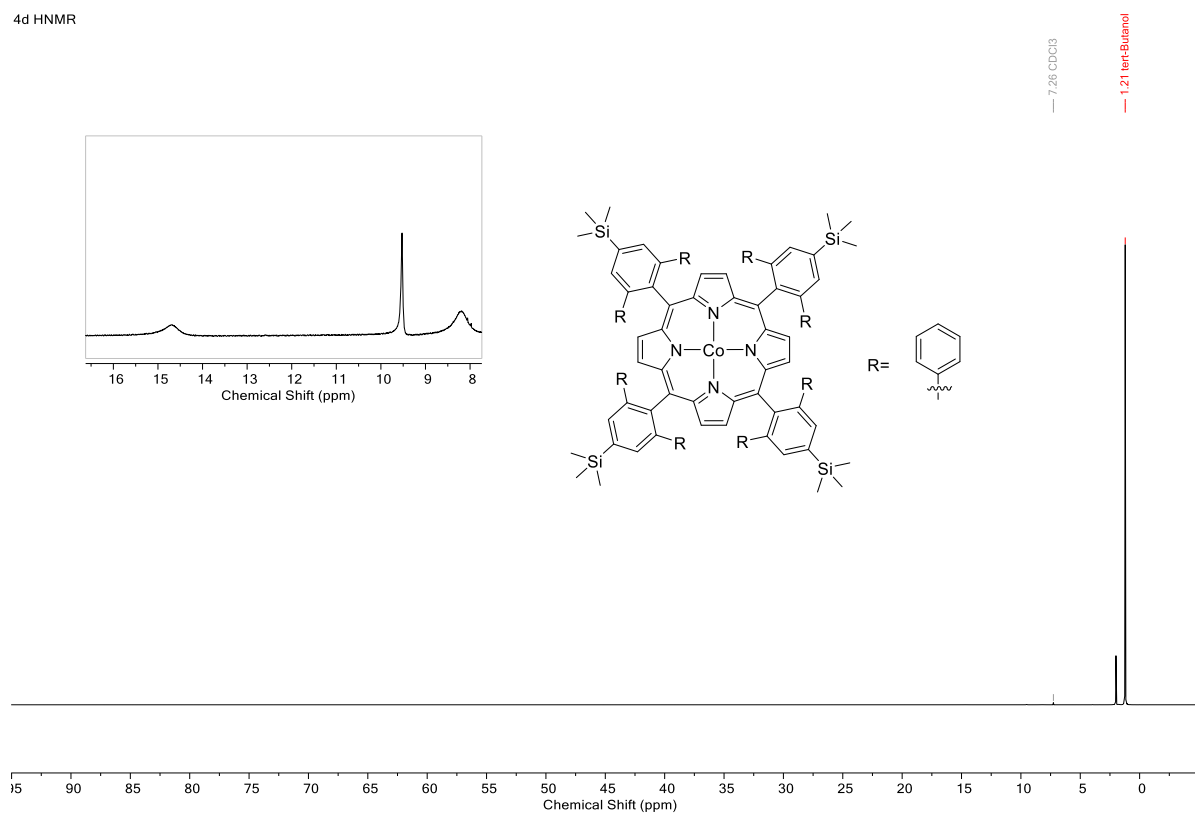

### 4e <sup>1</sup>H NMR (500 MHz, CDCl<sub>3</sub>) (n.b. paramagnetic)

4e HNMR

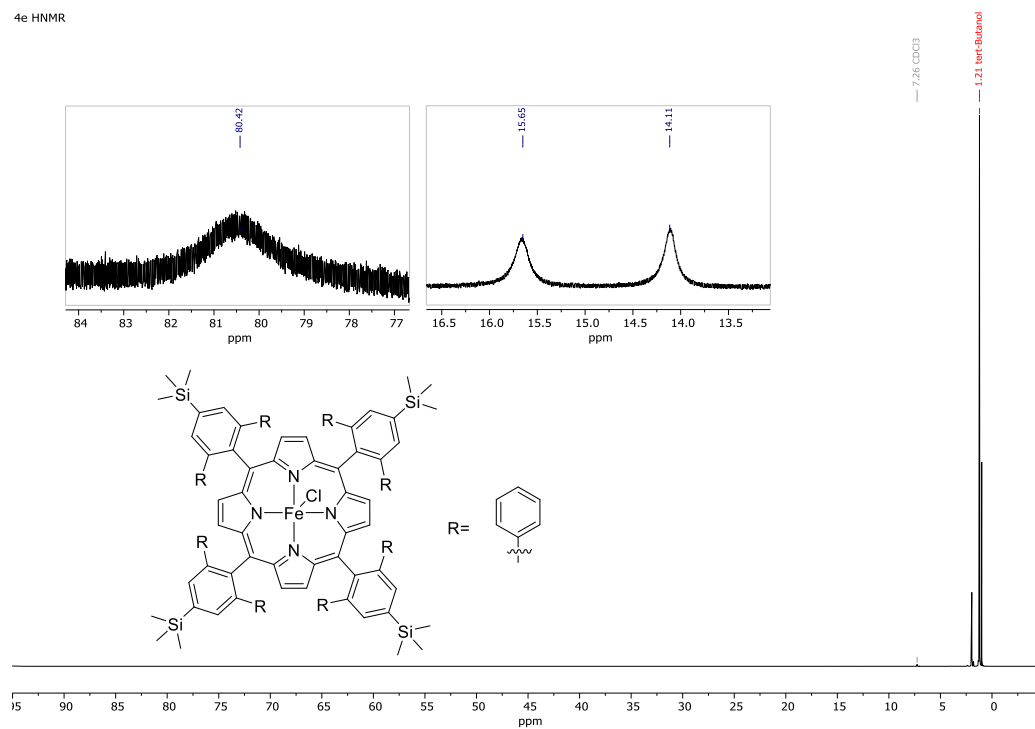

### 4f <sup>1</sup>H NMR (500 MHz, CDCl<sub>3</sub>) (n.b. paramagnetic)

4f HNMR

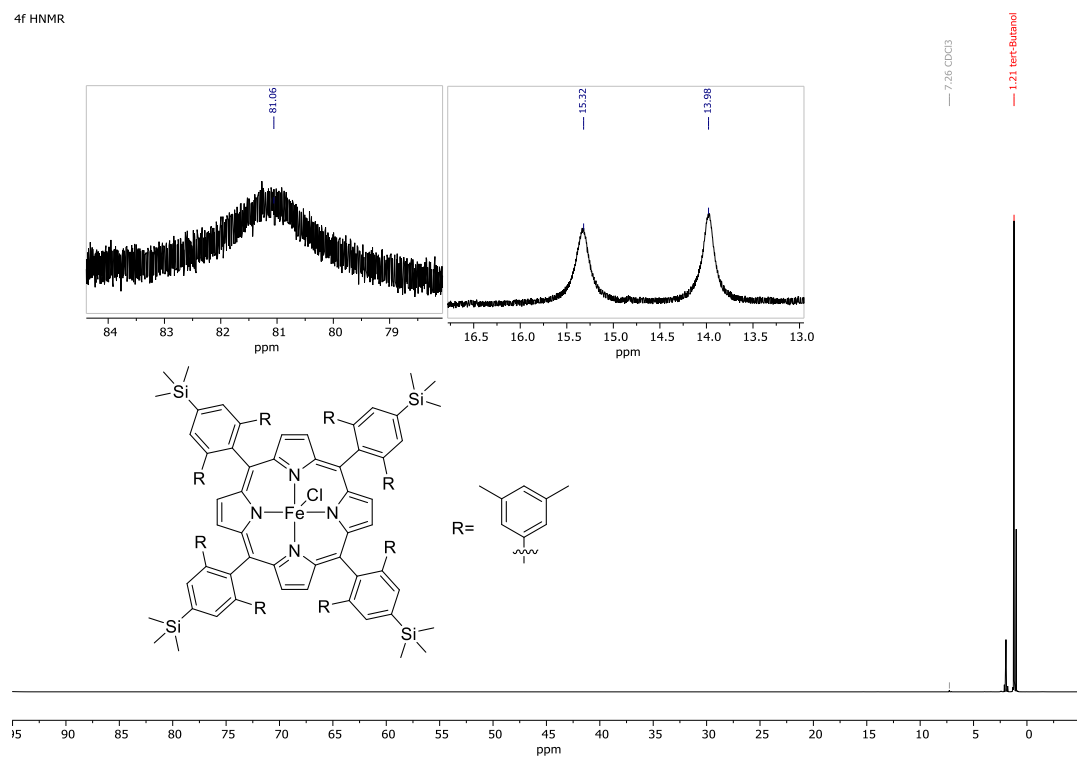

## High-Performance Liquid Chromatography

**4b**

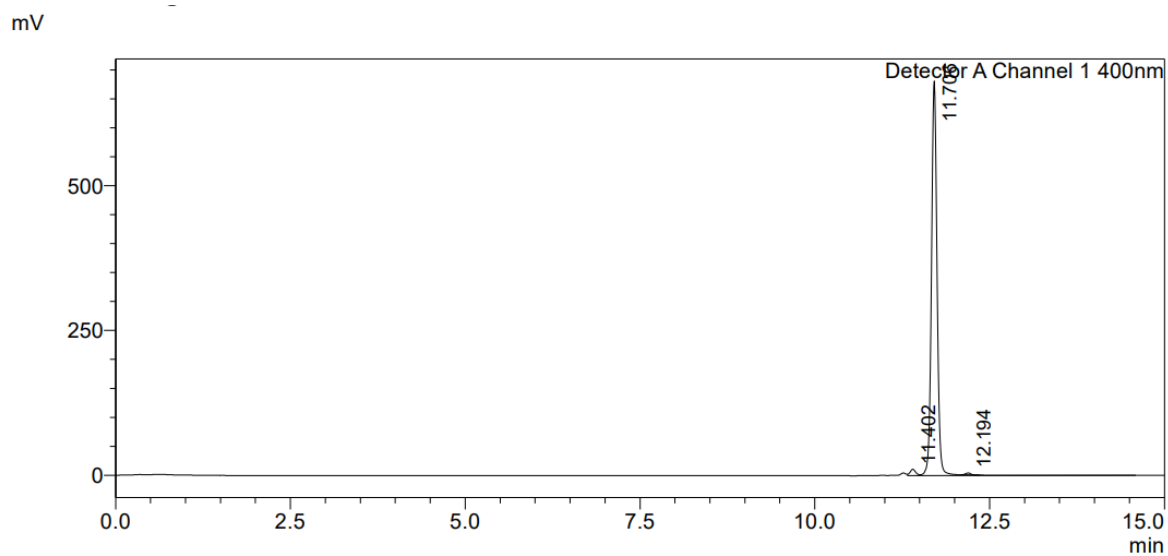

**Figure S1.** HPLC chromatogram of **4b** confirming >95% purity. Absorbance is measured at 400 nm and the analyte was eluted with a Hexane/DCM gradient of 0-100% DCM over 15 min.

**4d**

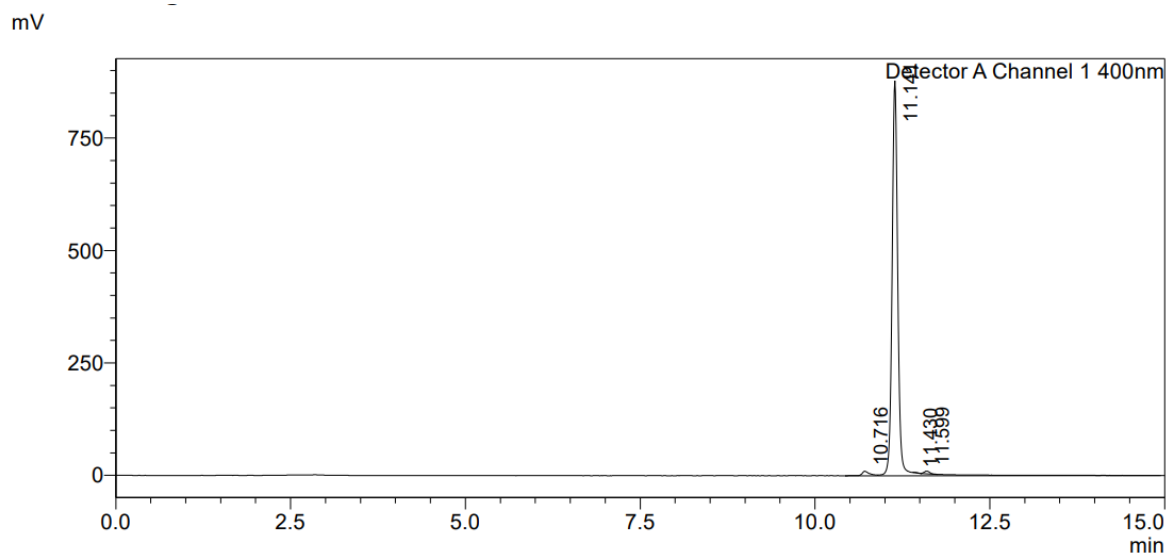

**Figure S2.** HPLC chromatogram of **4d** confirming >97% purity. Absorbance is measured at 400 nm and the analyte was eluted with a Hexane/DCM gradient of 0-100% DCM over 15 min.

4e

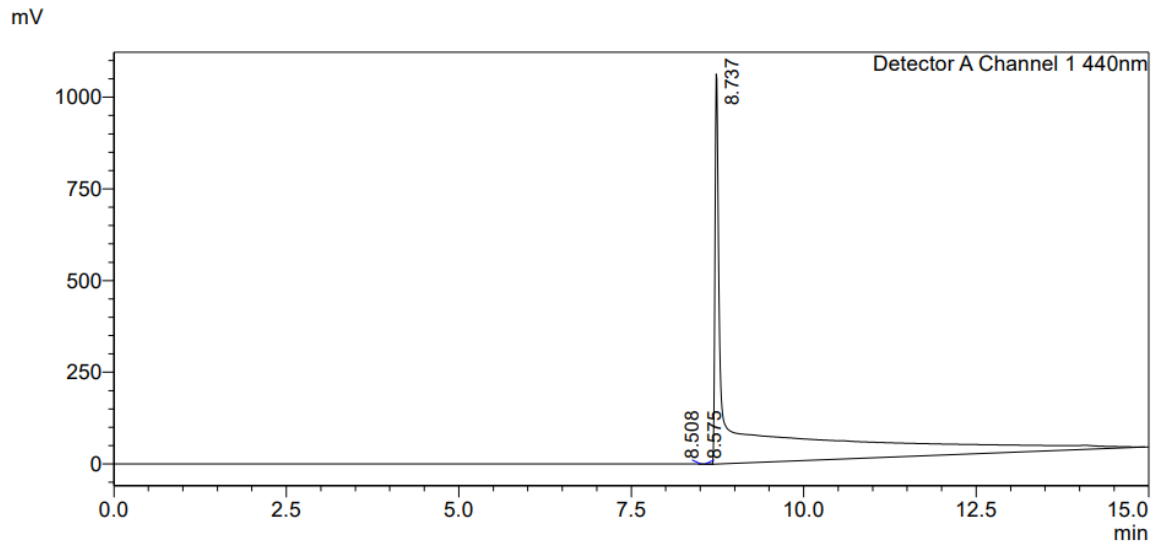

**Figure S3.** HPLC chromatogram of **4e** confirming >97% purity. Absorbance is measured at 440 nm and the analyte was eluted with a Hexane/DCM gradient of 0-100% DCM over 15 min.

4f

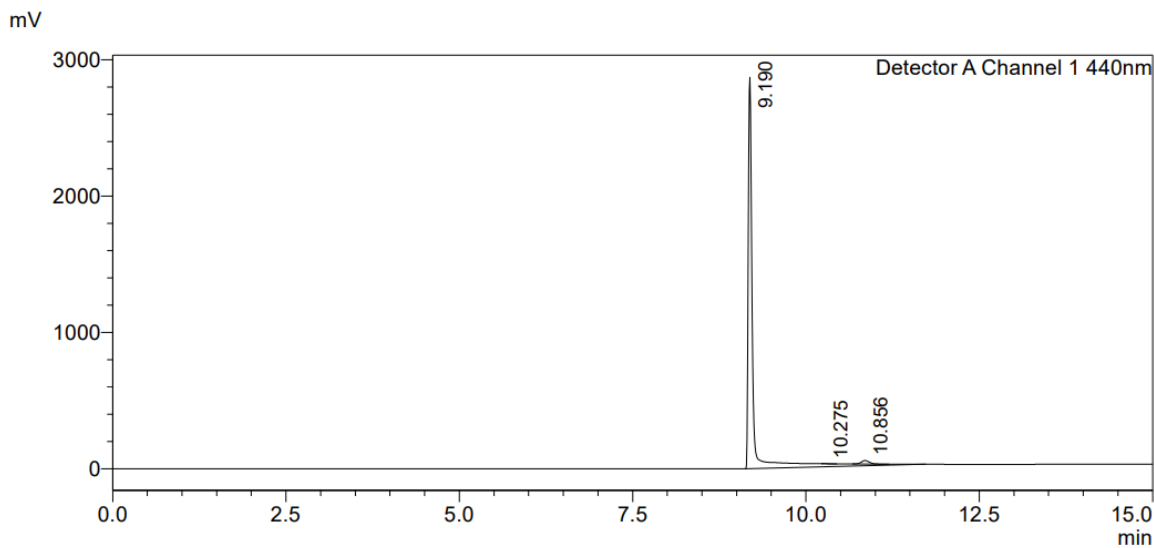

**Figure S4.** HPLC chromatogram of **4f** confirming >97% purity. Absorbance is measured at 440 nm and the analyte was eluted with a Hexane/DCM gradient of 0-100% DCM over 15 min.

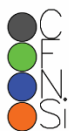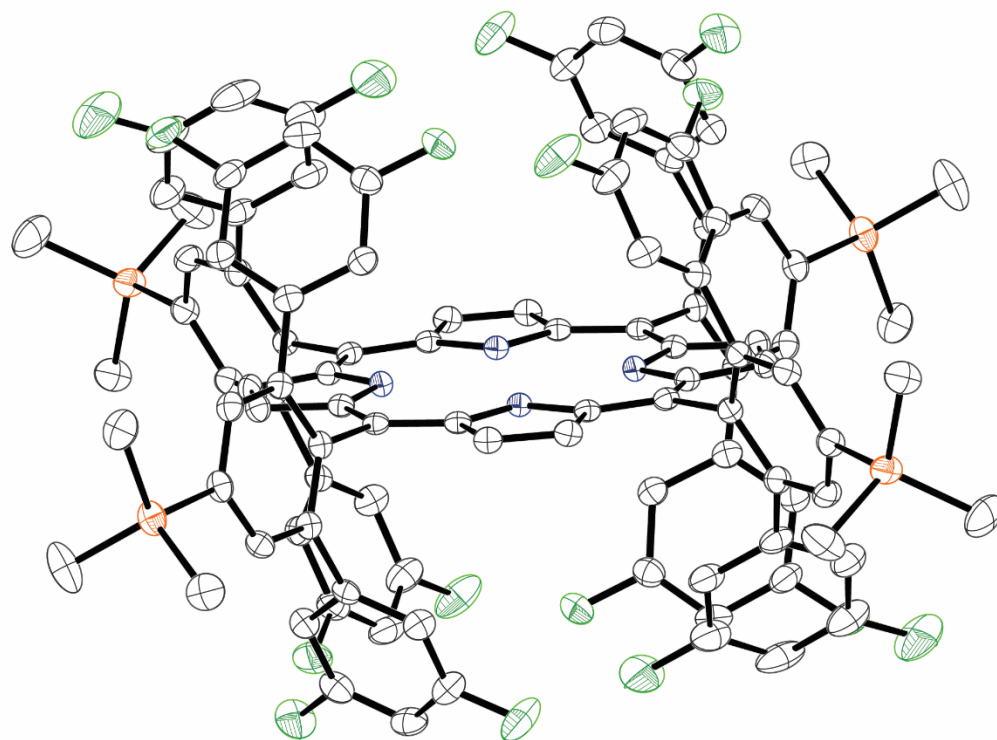

**Figure S5.** Thermal ellipsoid plot (50% ellipsoids) of the crystal structure of **2b**. H atoms and solvent omitted for clarity.

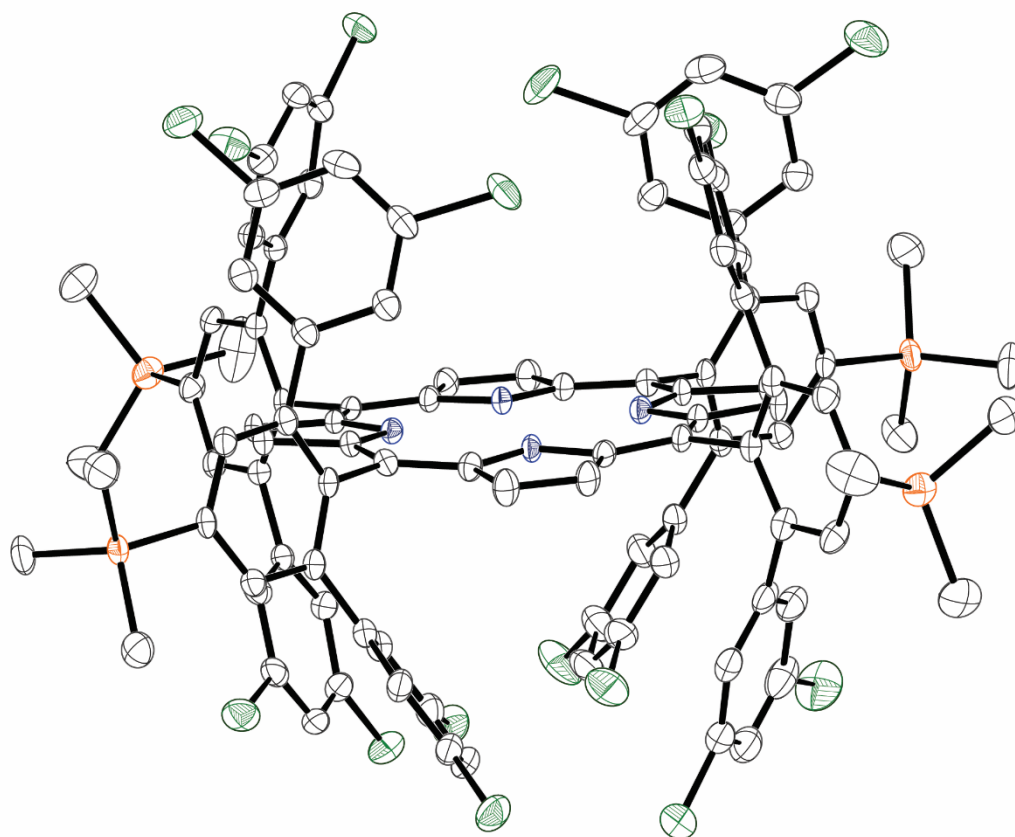

**Figure S6.** Thermal ellipsoid plot (50% ellipsoids) of the crystal structure of **2c**. H atoms and solvent omitted for clarity.



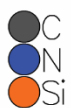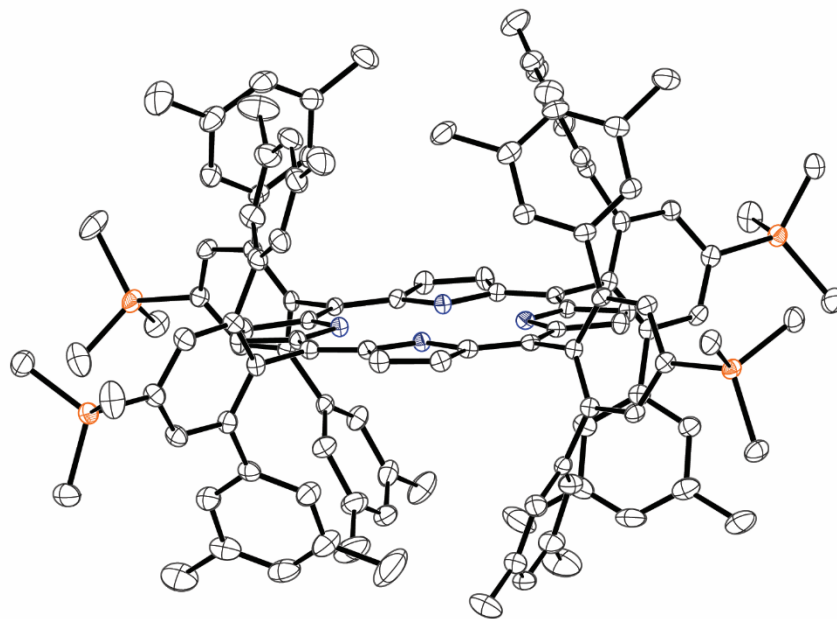

**Figure S7.** Thermal ellipsoid plot (50% ellipsoids) of the crystal structure of **2d**. H atoms and solvent omitted for clarity.

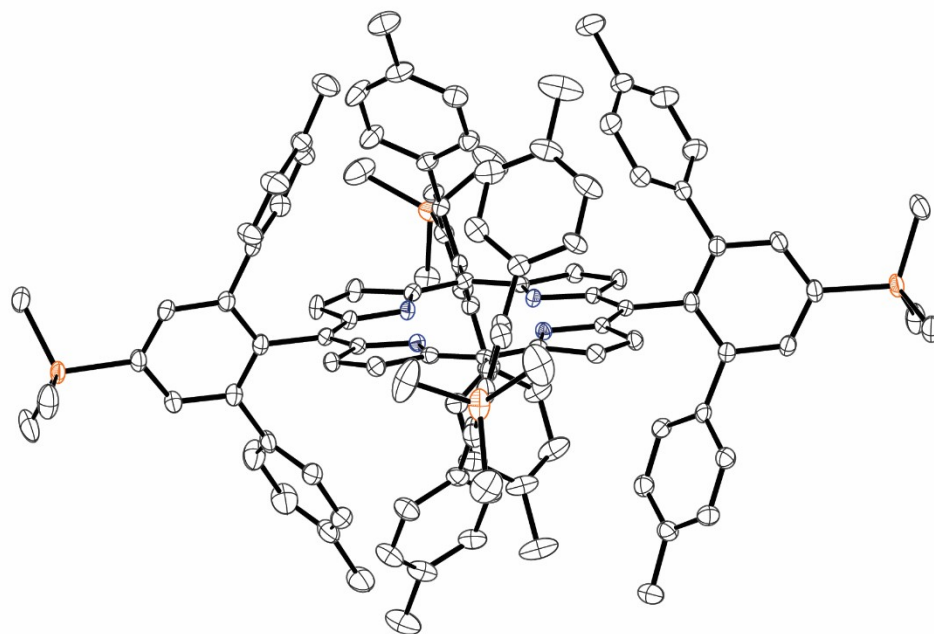

**Figure S8.** Thermal ellipsoid plot (50% ellipsoids) of the crystal structure of **2e**. H atoms, solvent, and minor components of the disorder omitted for clarity.

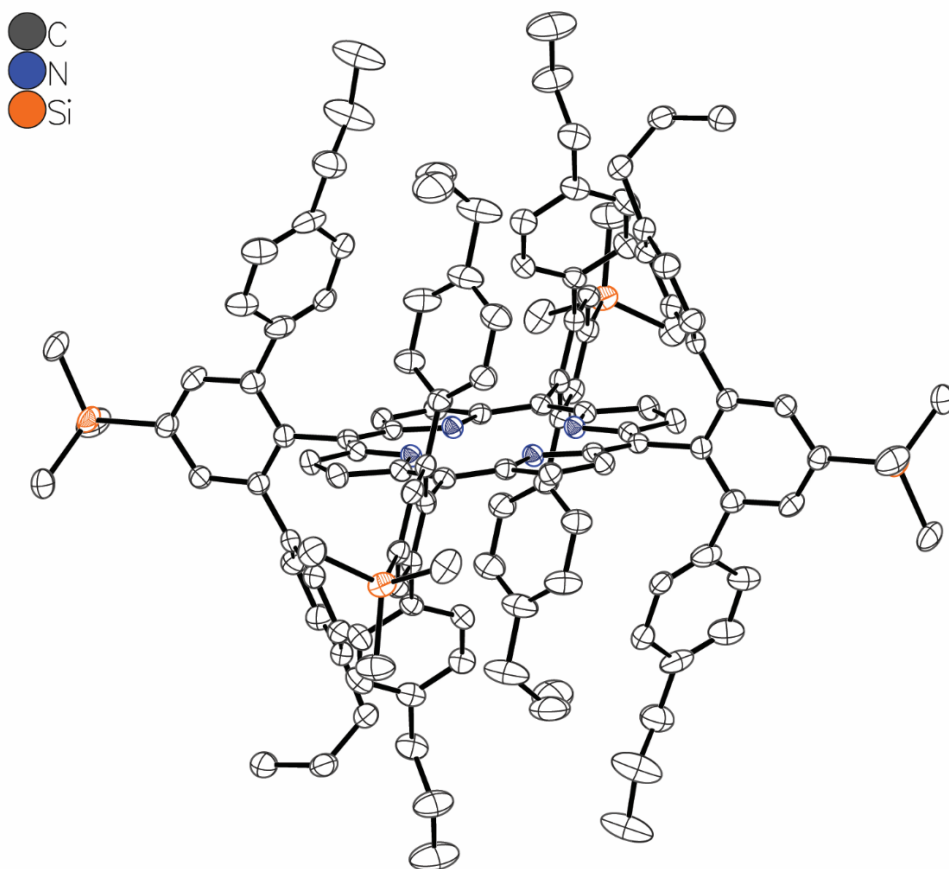

**Figure S9.** Thermal ellipsoid plot (50% ellipsoids) of the crystal structure of **2f**. H atoms, solvent, and minor components of the disorder omitted for clarity.

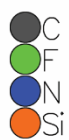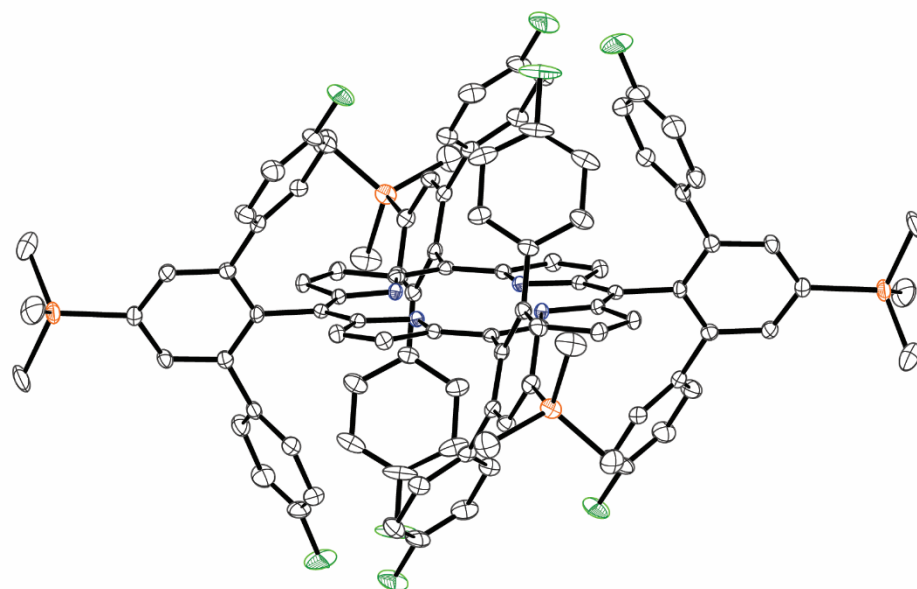

**Figure S10.** Thermal ellipsoid plot (50% ellipsoids) of the crystal structure of **2h**. H atoms and solvent omitted for clarity.

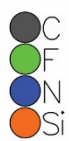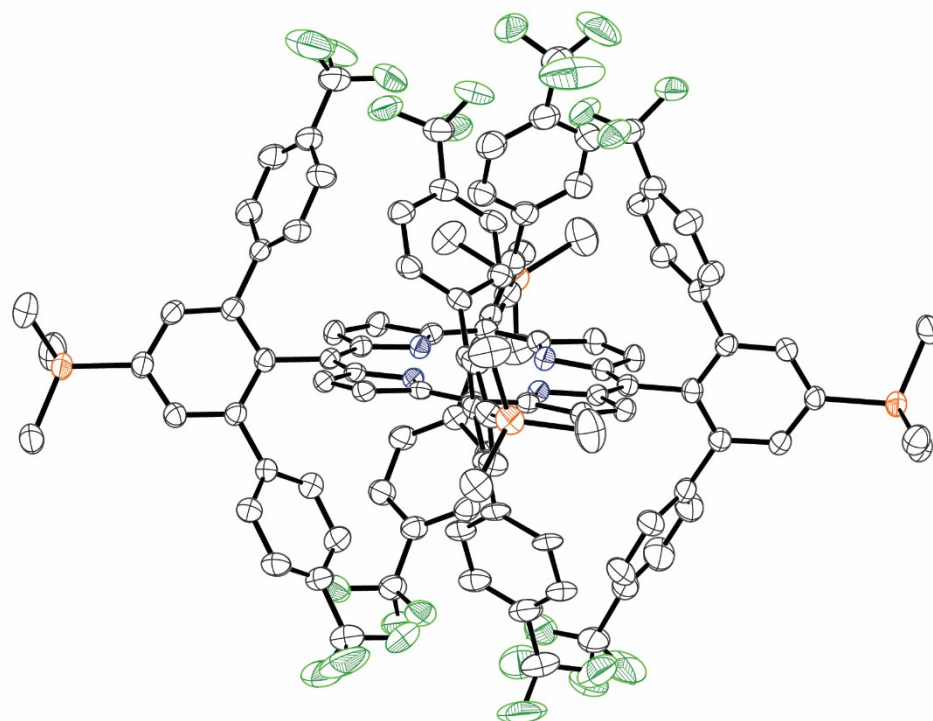

**Figure S11.** Thermal ellipsoid plot (50% ellipsoids) of the crystal structure of **2i**. H atoms, solvent, and minor components of the disorder omitted for clarity.

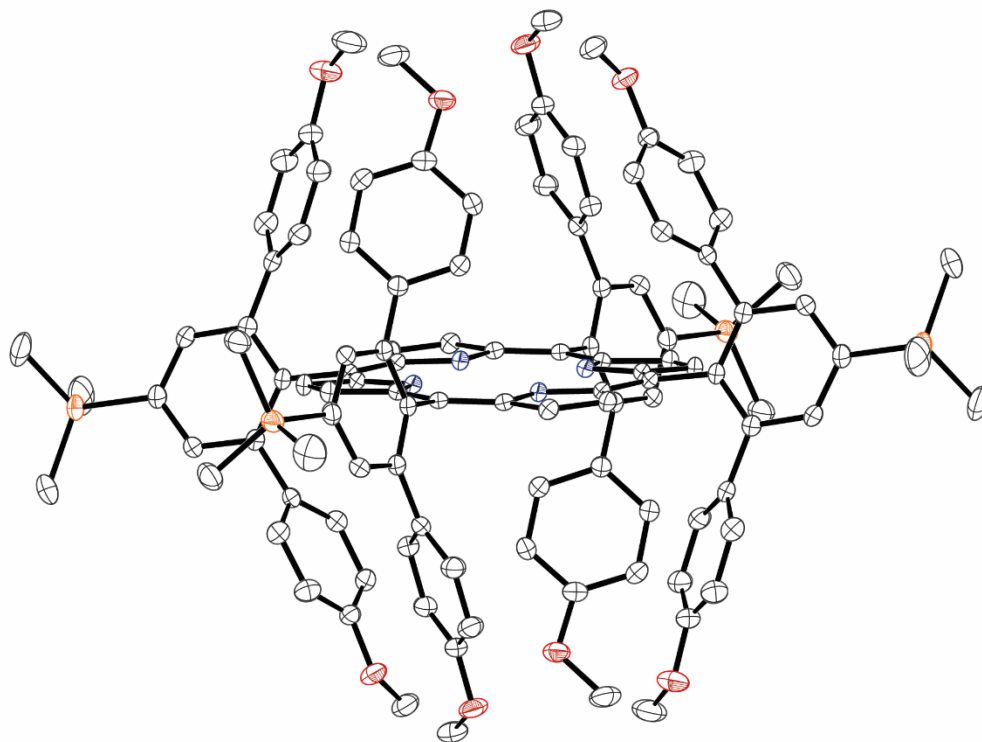

**Figure S12.** Thermal ellipsoid plot (50% ellipsoids) of the crystal structure of **2k**. H atoms and solvent omitted for clarity.

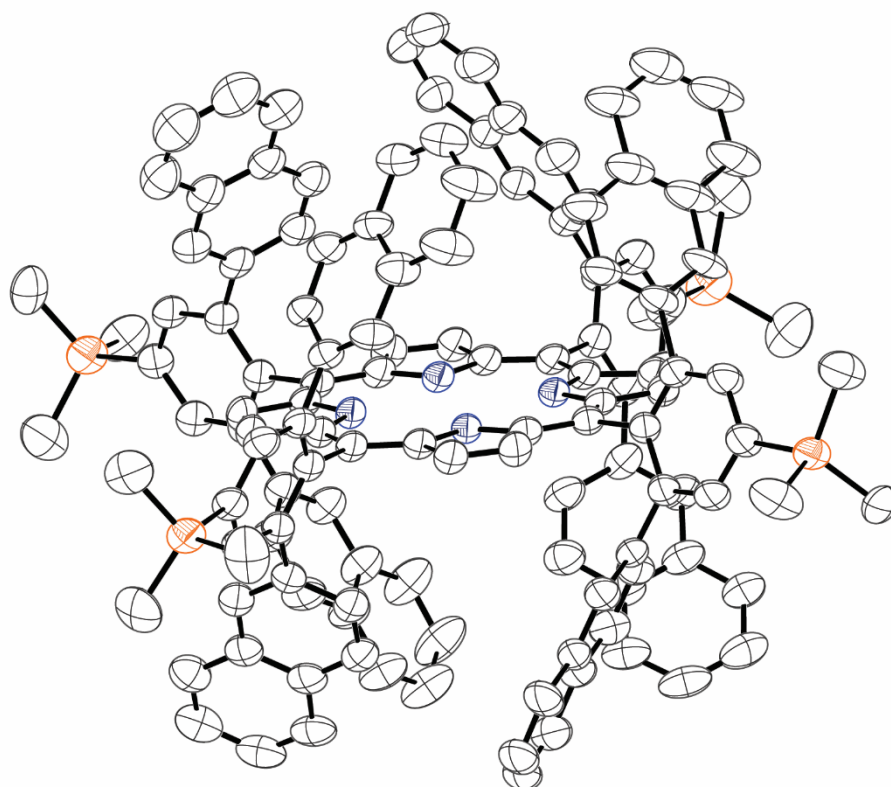

**Figure S13.** Thermal ellipsoid plot (50% ellipsoids) of the crystal structure of **21**. H atoms, solvent, and minor components of the disorder omitted for clarity.

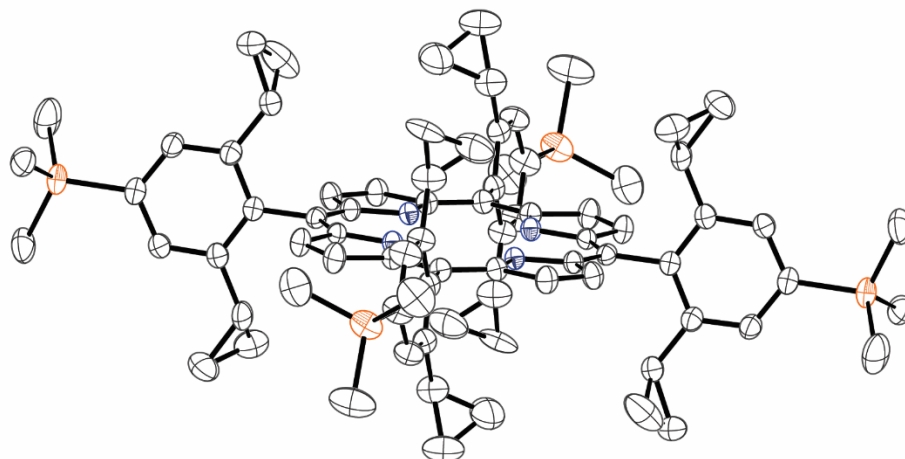

**Figure S14.** Thermal ellipsoid plot (50% ellipsoids) of the crystal structure of **2m**. H atoms, solvent, and minor components of the disorder omitted for clarity.



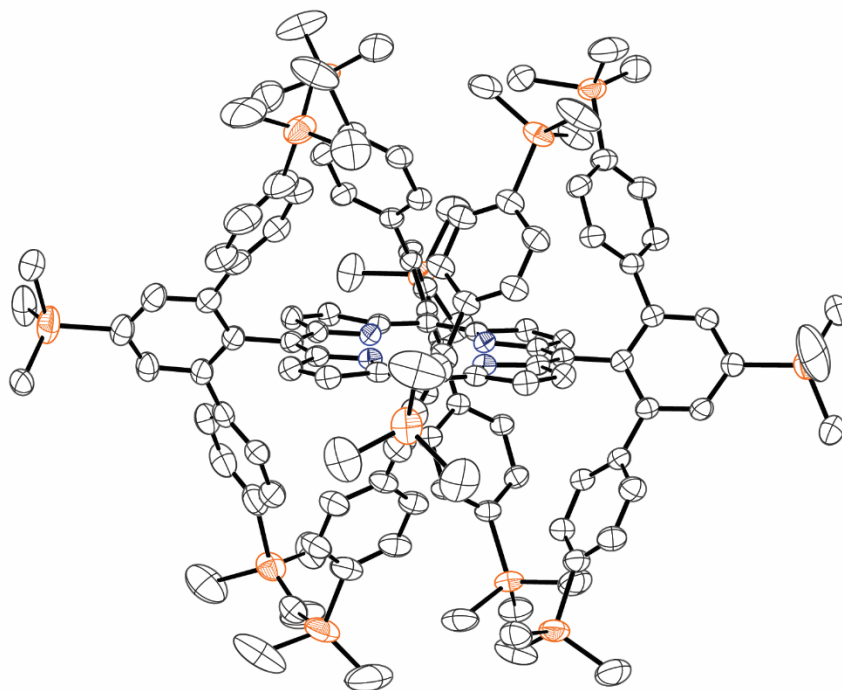

**Figure S15.** Thermal ellipsoid plot (50% ellipsoids) of the crystal structure of **20**. H atoms, solvent, and minor components of the disorder omitted for clarity.

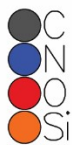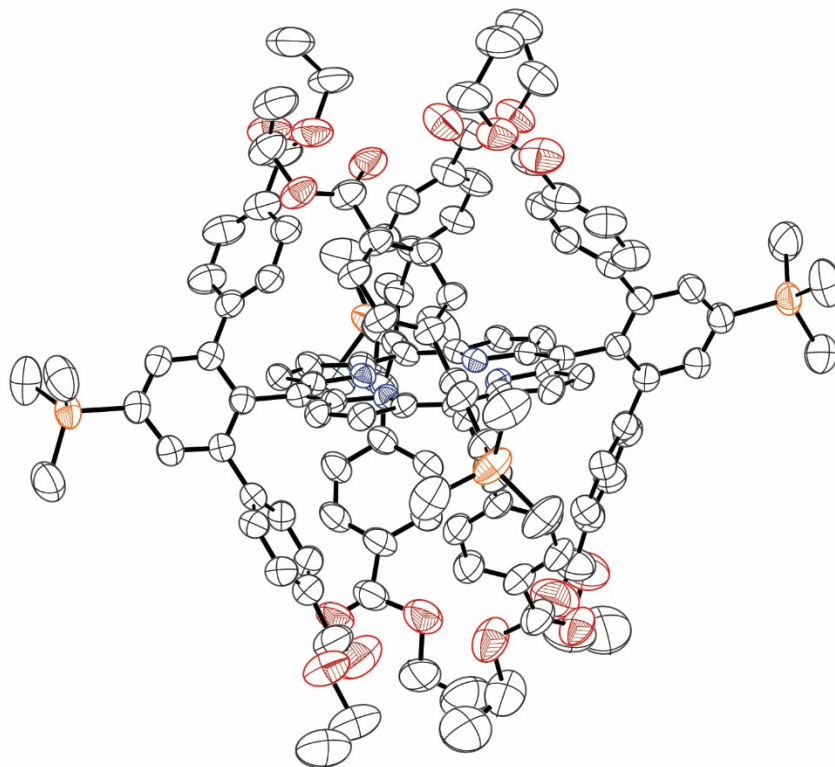

**Figure S16.** Thermal ellipsoid plot (50% ellipsoids) of the crystal structure of **2p**. H atoms, solvent, and minor components of the disorder omitted for clarity.

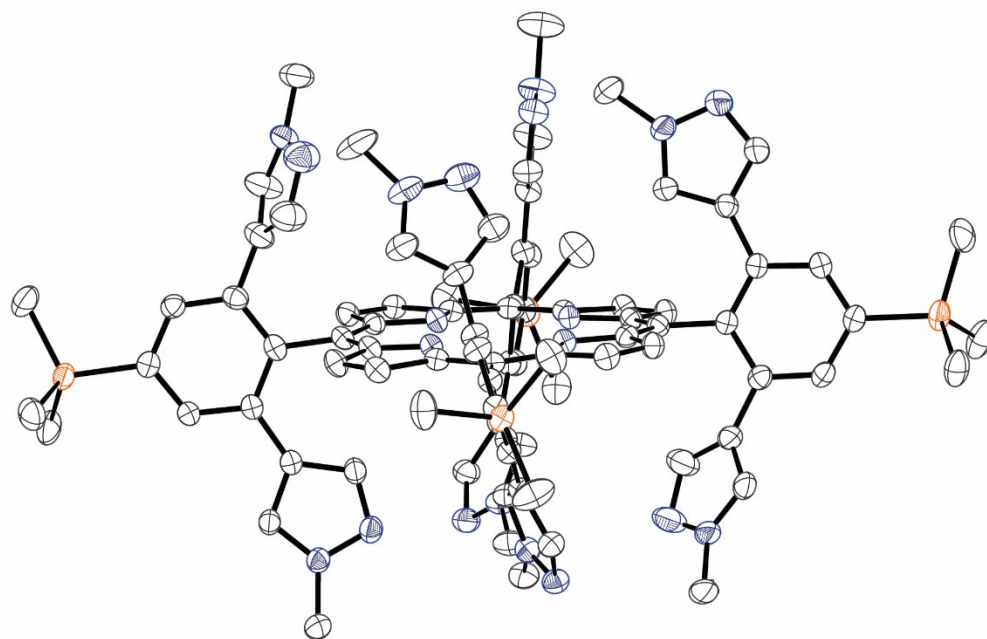

**Figure S17.** Thermal ellipsoid plot (50% ellipsoids) of the crystal structure of **2q**. H atoms, solvent, and minor components of the disorder omitted for clarity.

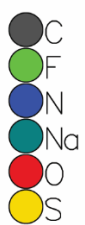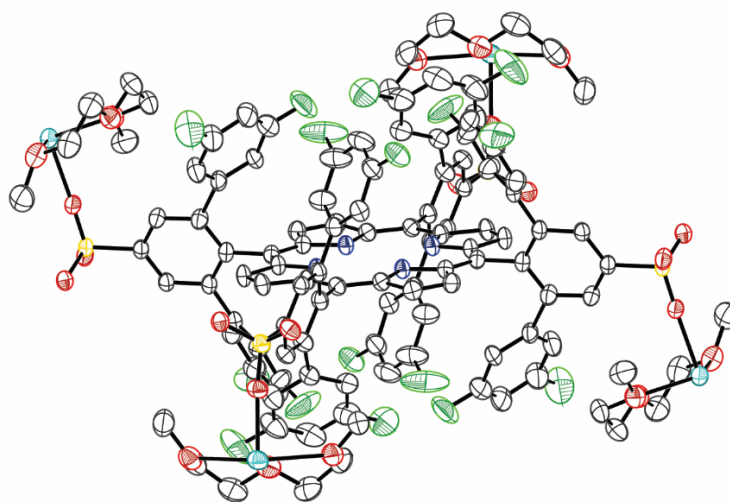

**Figure S18.** Thermal ellipsoid plot (50% ellipsoids) of the crystal structure of **3b**. H atoms, solvent, and minor components of the disorder omitted for clarity.

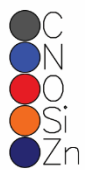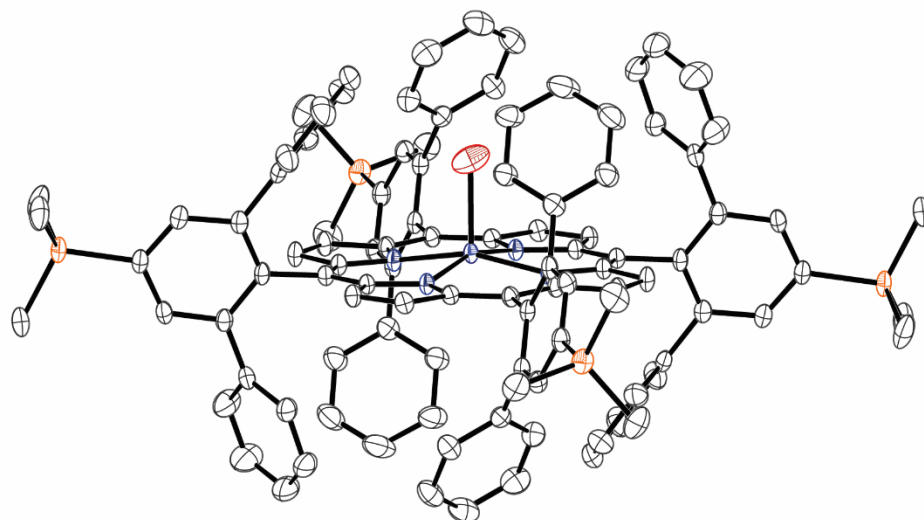

**Figure S19.** Thermal ellipsoid plot (50% ellipsoids) of the crystal structure of **4a**. H atoms, solvent, and minor components of the disorder omitted for clarity.

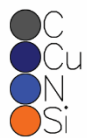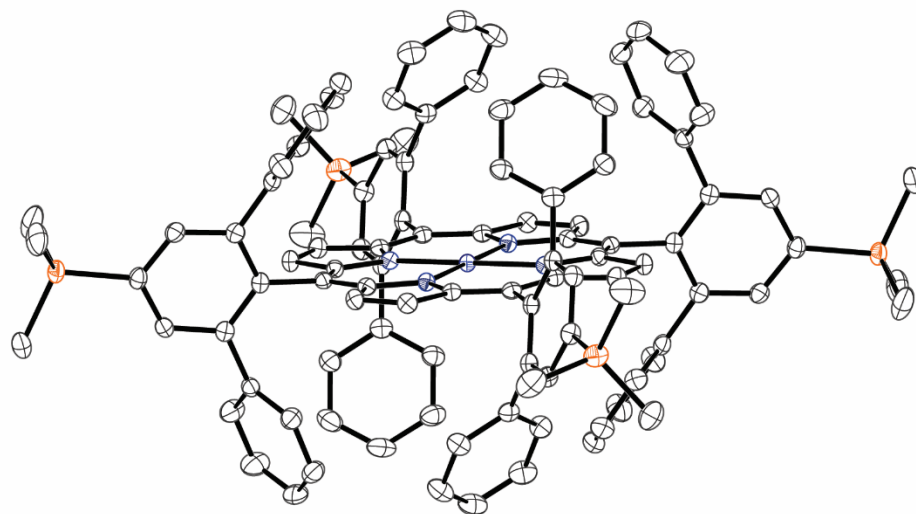

**Figure S20.** Thermal ellipsoid plot (50% ellipsoids) of the crystal structure of **4b**. H atoms and solvent omitted for clarity.

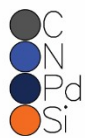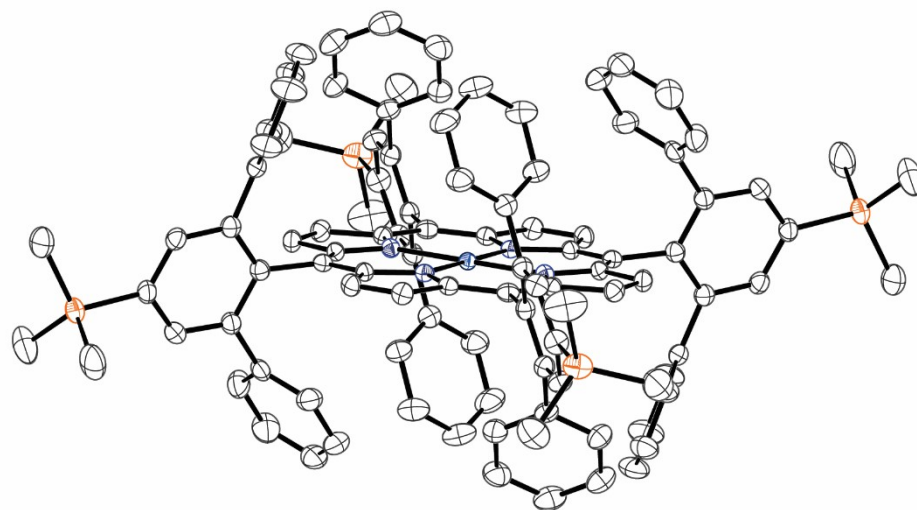

**Figure S21.** Thermal ellipsoid plot (50% ellipsoids) of the crystal structure of **4c**. H atoms and solvent omitted for clarity.

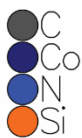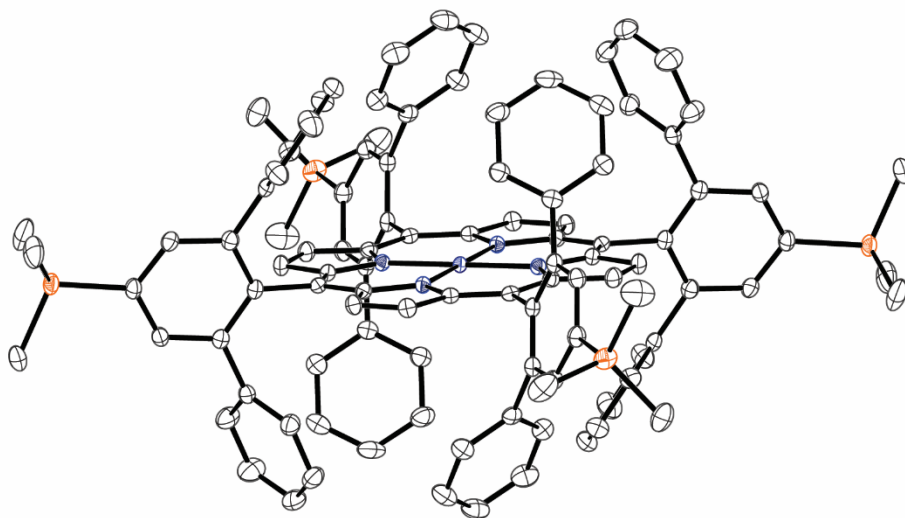

**Figure S22.** Thermal ellipsoid plot (50% ellipsoids) of the crystal structure of **4d**. H atoms and solvent omitted for clarity.



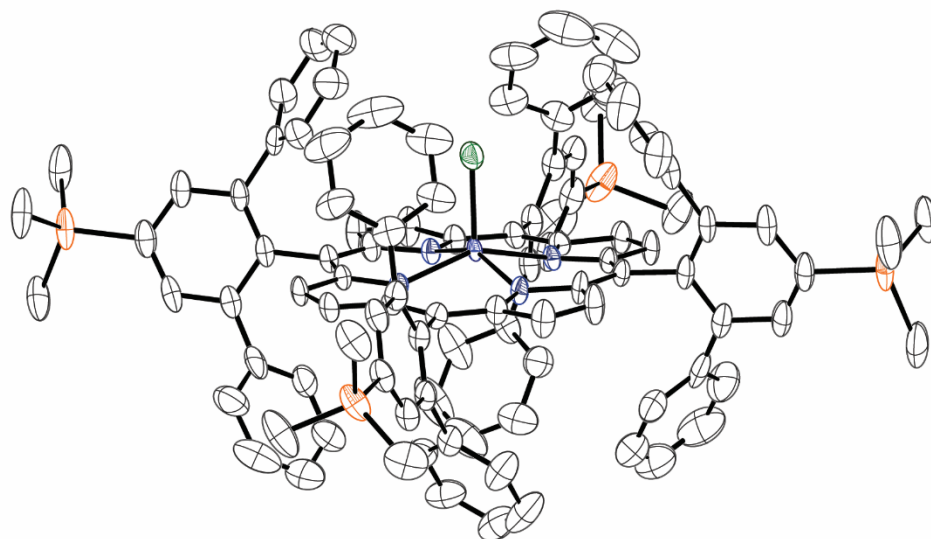

**Figure S23.** Thermal ellipsoid plot (50% ellipsoids) of the crystal structure of **4e**. H atoms, solvent, and minor components of the disorder omitted for clarity.

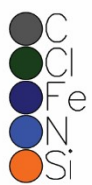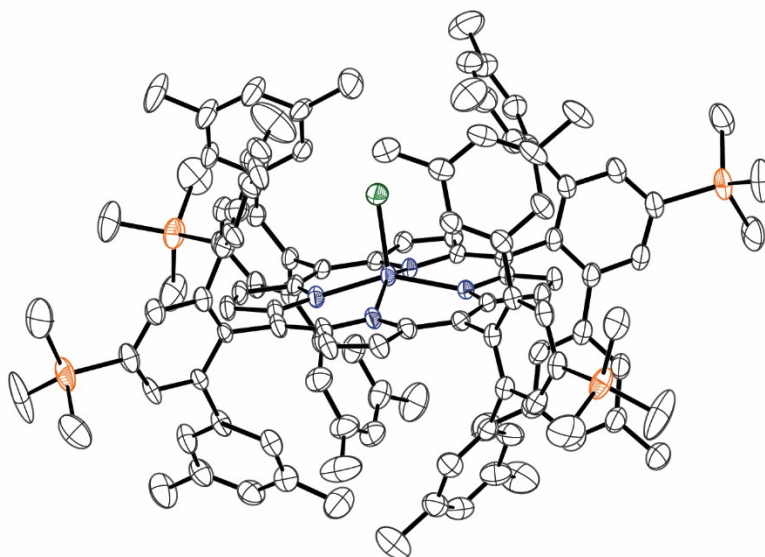

**Figure S24.** Thermal ellipsoid plot (50% ellipsoids) of the crystal structure of **4f**. H atoms, solvent, and minor components of the disorder omitted for clarity.

## References

1. Durrant, J. D.; Votapka, L.; Sørensen, J.; Amaro, R. E., POVME 2.0: An Enhanced Tool for Determining Pocket Shape and Volume Characteristics. *J. Chem. Theory Comput.* **2014**, *10*, 5047-5056.
2. Pettersen, E. F.; Goddard, T. D.; Huang, C. C.; Meng, E. C.; Couch, G. S.; Croll, T. I.; Morris, J. H.; Ferrin, T. E., UCSF ChimeraX: Structure visualization for researchers, educators, and developers. *Protein Sci.* **2020**, *30*, 70-82.
3. Rigaku Oxford Diffraction *CrysAlis<sup>Pro</sup> software system*, version 1.171.40.78a; Rigaku Corporation: Wroclaw, Poland, 2020.
4. Sheldrick, G. M., *SHELXT* – Integrated space-group and crystal-structure determination. *Acta Crystallogr. Sect. A* **2015**, *71*, 3-8.
5. Sheldrick, G. M., Crystal structure refinement with *SHELXL*. *Acta Crystallogr. Sect. C* **2015**, *71*, 3-8.
6. Dolomanov, O. V.; Bourhis, L. J.; Gildea, R. J.; Howard, J. A. K.; Puschmann, H., *OLEX2*: a complete structure solution, refinement and analysis program. *J. Appl. Crystallogr.* **2009**, *42*, 339-341.
7. Müller, P., Practical suggestions for better crystal structures. *Crystallogr. Rev.* **2009**, *15*, 57-83.
